1                   **Remyelination alters the pattern of myelin in the cerebral cortex**

2  
3 Jennifer Orthmann-Murphy<sup>1,2\*</sup>, Cody L. Call<sup>1\*</sup>, Gian Carlo Molina-Castro<sup>1</sup>, Yu Chen Hsieh<sup>1‡</sup>,  
4 Matthew N. Rasband<sup>3</sup>, Peter A. Calabresi<sup>4</sup>, Dwight E. Bergles<sup>1,5</sup>

5  
6  
7 <sup>1</sup>The Solomon Snyder Department of Neuroscience, Johns Hopkins University, Baltimore,  
8 Maryland 21205, USA

9  
10 <sup>2</sup>Department of Neurology, Perelman School of Medicine, University of Pennsylvania,  
11 Philadelphia, Pennsylvania 19104, USA

12  
13 <sup>3</sup>Department of Neuroscience, Baylor College of Medicine, One Baylor Plaza, Houston, TX  
14 77030, USA

15  
16 <sup>4</sup>Department of Neurology Johns Hopkins University, Baltimore, Maryland 21205, USA

17  
18 <sup>5</sup>Johns Hopkins University Kavli Neuroscience Discovery Institute, Baltimore, Maryland 21205  
19 USA

20  
21  
22 \* Equal contribution

23  
24 ‡Current address:

25 Department of Molecular Biology, Simches Research Center, Massachusetts General Hospital,  
26 185 Cambridge Street, Boston, MA 02114

27  
28  
29 Correspondence:

30 Dwight E. Bergles, PhD

31 Solomon H. Snyder Department of Neuroscience

32 Johns Hopkins University School of Medicine

33 725 N. Wolfe Street, Baltimore, MD 21205, USA

34 P:410-955-6939

35 [dbergles@jhmi.edu](mailto:dbergles@jhmi.edu)

36 **ABSTRACT**

37

38 Destruction of oligodendrocytes and myelin sheaths in cortical gray matter profoundly alters  
39 neural activity and is associated with cognitive disability in multiple sclerosis (MS). Myelin can  
40 be restored by regenerating oligodendrocytes from resident progenitors; however, it is not  
41 known whether regeneration restores the complex myelination patterns in cortical circuits. Here  
42 we performed time lapse *in vivo* two photon imaging in somatosensory cortex of adult mice to  
43 define the kinetics and specificity of myelin regeneration after acute oligodendrocyte ablation.  
44 These longitudinal studies revealed that the pattern of myelination in cortex changed  
45 dramatically after regeneration, as new oligodendrocytes were formed in different locations and  
46 new sheaths were often established along axon segments previously lacking myelin. Despite  
47 the dramatic increase in axonal territory available, oligodendrogenesis was persistently impaired  
48 in deeper cortical layers that experienced higher gliosis. The repeated reorganization of myelin  
49 patterns in MS may alter circuit function and contribute to cognitive decline.

50

51

52 **INTRODUCTION**

53

54 Oligodendrocytes form concentric sheets of membrane around axons that enhance the speed of  
55 action potential propagation, provide metabolic support and control neuronal excitability through  
56 ion homeostasis. Consequently, loss of oligodendrocytes and myelin can alter the firing  
57 behavior of neurons and impair their survival, leading to profound disability in diseases such as  
58 multiple sclerosis (MS), in which the immune system inappropriately targets myelin for  
59 destruction. In both relapsing-remitting forms of MS and the cuprizone model of demyelination in  
60 mouse, the CNS is capable of spontaneous remyelination through mobilization of  
61 oligodendrocyte precursor cells (OPCs) (Baxi et al., 2017; Chang, Nishiyama, Peterson,  
62 Prineas, & Trapp, 2000; Chang et al., 2012), which remain abundant in both gray and white  
63 matter throughout adulthood (Dimou, Simon, Kirchhoff, Takebayashi, & Götz, 2008; Hughes,  
64 Kang, Fukaya, & Bergles, 2013; Young et al., 2013). The highly ordered structure of myelin in  
65 white matter tracts has enabled *in vivo* longitudinal tracking of inflammatory demyelinating  
66 lesions using magnetic resonance imaging (MRI); however, due to the low spatial resolution of  
67 standard MRI sequences (Oh et al., 2019) and the indirect nature of MR methods used to  
68 assess the integrity of myelin (Walhovd, Johansen-Berg, & Káradóttir, 2014), our knowledge

69 about the dynamics of OPC recruitment, oligodendrogenesis and remyelination within specific  
70 neural circuits remains limited.

71 *In vivo* studies of remyelination have focused primarily on white matter, where assessments  
72 of myelin are aided by the high density and symmetrical alignment of myelin sheaths; however,  
73 postmortem histological analysis (Kidd et al., 1999; Kutzelnigg, 2005; Lucchinetti et al., 2011;  
74 Peterson, Bö, Mörk, Chang, & Trapp, 2001) and new *in vivo* MRI and PET imaging methods  
75 (Beck et al., 2018; Filippi et al., 2014; Herranz et al., 2019; Kilsdonk et al., 2013; R. Magliozzi,  
76 Reynolds, & Calabrese, 2018) indicate that demyelination is also prevalent in cortical gray  
77 matter of MS patients. Cortical lesion load correlates with signs of physical and cognitive  
78 disability, including cognitive impairment, fatigue and memory loss (Calabrese et al., 2012;  
79 Nielsen et al., 2013). Nevertheless, much less is known about the capacity for repair of myelin in  
80 cortical circuits. Defining how gray matter lesions are resolved *in vivo* is critical for both MS  
81 prognosis and the development of new therapies to promote remyelination.

82 Unlike white matter, myelination patterns in the cerebral cortex are highly variable, with  
83 sheath content varying between cortical regions, among different types of neurons and even  
84 along the length of individual axons (Micheva et al., 2016; Tomassy et al., 2014). Despite this  
85 evidence of discontinuous myelination, recent *in vivo* imaging studies indicate that both  
86 oligodendrocytes and individual myelin sheaths are remarkably stable in the adult brain (Hill, Li,  
87 & Grutzendler, 2018; Hughes, Orthmann-Murphy, Langseth, & Bergles, 2018), suggesting that  
88 maintaining precise sheath placement is important for cortical function. However, the complex  
89 arrangement of cortical myelin presents significant challenges for repair and it is unknown  
90 whether precise myelination patterns in the cortex are restored following a demyelinating event.

91 *In vivo* two photon fluorescence microscopy allows visualization of oligodendrogenesis and  
92 myelin sheath formation in mammalian circuits at high resolution, providing the means to define  
93 both the dynamics and specificity of regeneration (Hughes et al., 2018). Here, we used this  
94 high-resolution imaging method to define the extent of oligodendrocyte regeneration and the  
95 specificity of myelin replacement within the adult somatosensory cortex after demyelination.  
96 Unexpectedly, our studies indicate that oligodendrocytes are regenerated in locations distinct  
97 from those occupied before injury. Despite the additional available axonal territory for  
98 myelination, regenerated oligodendrocytes had a similar size and structure; as a result, only a  
99 fraction of prior sheaths were replaced and many new sheaths were formed on previously  
100 unmyelinated regions of axons. Conversely, in regions of high territory overlap, new  
101 oligodendrocytes often formed sheaths along the same segment of specific axons,  
102 demonstrating that precise repair is possible. Together, these *in vivo* findings indicate that

103 regeneration of oligodendrocytes in the cortex creates a new pattern of myelination, with  
104 important implications for the restoration of sensory processing and cognition.

105

## 106 **RESULTS**

107

### 108 **Inefficient regeneration of oligodendrocytes in cortical gray matter**

109 To define the dynamics of oligodendrocyte regeneration and axonal remyelination in the  
110 cerebral cortex, we performed longitudinal two photon imaging through a cranial window placed  
111 over the barrel field of the somatosensory cortex in transgenic mice that express EGFP under  
112 control of the promoter/enhancer for myelin-associated oligodendrocyte basic protein (*Mobp-EGFP*)  
113 mice (Hughes et al., 2018) (Figure 1A). In these mice, complete oligodendrocyte  
114 morphologies could be resolved *in vivo*, including cytoplasmic processes and individual myelin  
115 internodes within the upper layers of the cortex. In these regions, oligodendrocytes ensheath a  
116 select group of axons, including long-range axonal projections oriented horizontally to the pia  
117 (Bock et al., 2011) (Figure 1B), and in deeper layers, vertically-oriented axons belonging to both  
118 local cortical neurons and long-range projections (Figure 1A,C). To induce demyelination, young  
119 adult *Mobp-EGFP* mice (age 8-12 weeks) were fed chow mixed with 0.2% cuprizone, a copper  
120 chelator that induces robust fragmentation and apoptosis of oligodendrocytes (Vega-Riquer,  
121 Mendez-Victoriano, Morales-Luckie, & Gonzalez-Perez, 2019) (Supplementary Figure 1), and  
122 multiple volumes (425  $\mu\text{m}$  x 425  $\mu\text{m}$  x 550  $\mu\text{m}$ ) corresponding to layers I–IV were imaged  
123 repeatedly prior to injury, during demyelination and through recovery for up to 12 weeks (Figure  
124 1D, Supplementary Video 1).

125 Oligodendrocytes and individual myelin sheaths are extraordinarily stable in the adult  
126 brain (Hill et al., 2018; Hughes et al., 2018; Yeung et al., 2014); however, the amount of myelin  
127 within these circuits is not static, as new oligodendrocytes continue to be generated in the adult  
128 CNS, each of which produces dozens of sheaths (Hughes et al., 2018; Kang, Fukaya, Yang,  
129 Rothstein, & Bergles, 2010; Xiao et al., 2016). This phenomenon was visible during *in vivo*  
130 imaging in *Mobp-EGFP* mice as new EGFP-expressing (EGFP+) oligodendrocytes appeared  
131 within the imaging field (Figure 1E, F, H), continuously adding to the baseline oligodendrocyte  
132 population (Figure 1H; Supplementary Video 2). When mice were fed cuprizone for three  
133 weeks, > 90% of the baseline population of oligodendrocytes within the upper layers of cortex  
134 degenerated ( $94.2 \pm 0.05\%$ ; N = 6 mice, mean  $\pm$  SEM) (Figure 1E,G,I; Supplementary Video 3),  
135 with most cell loss occurring after cessation of cuprizone exposure (Figure 1I,J). New  
136 oligodendrocytes initially appeared rapidly during the recovery phase (Figure 1K); however, this

137 burst of oligodendrogenesis was not sustained, and as a consequence, only about half of the  
138 oligodendrocytes ( $55.2 \pm 0.03\%$ ) were replaced after nine weeks of recovery. Extrapolating from  
139 the rate of addition from the last recovery time-point ( $3.5 \pm 0.5\%$  per week, Figure 1K), it would  
140 take approximately three additional months ( $\sim 12.8$  weeks) to achieve the density of  
141 oligodendrocytes prior to cuprizone, which is  $\sim$ two-fold greater in middle-aged cortices (Hughes  
142 et al., 2018). Thus, these young mice would be  $> 13$  months old by the time they achieved full  
143 recovery, assuming a constant rate of addition. However, as oligodendrogenesis declines with  
144 age in both control and cuprizone-treated mice (Figure 1K) relative to age-matched control  
145 mice, cuprizone-treated mice may never reach a normal oligodendrocyte density after  
146 demyelination. These results indicate that although a prominent regenerative response is  
147 initiated in cortical gray matter, oligodendrocyte regeneration is much slower (Baxi et al., 2017)  
148 and less complete than in white matter (Baxi et al., 2017; Gudi et al., 2009; Jeffery &  
149 Blakemore, 1995; Matsushima & Morell, 2001).

150

#### 151 **Layer specific differences in cortical remyelination**

152 The cerebral cortex is a highly layered structure, in which genetically and morphologically  
153 distinct neurons form specialized subnetworks (Lodato & Arlotta, 2015), raising the possibility  
154 that they may adopt different myelination patterns to optimize circuit capabilities (Micheva et al.,  
155 2016; Stedehouder et al., 2017; Tomassy et al., 2014). Indeed, myelination patterns are highly  
156 non-uniform across the cortex (Supplementary Figure 2) and both oligodendrocyte density and  
157 myelin content increase with depth from the cortical surface (Hughes et al., 2018) (Figure 1C).  
158 However, it is not known whether the capacity for myelin repair is comparable between cortical  
159 layers. To examine depth-dependent changes in oligodendrogenesis, we subdivided imaging  
160 volumes into three  $100 \mu\text{m}$  zones starting from the pial surface (Figure 2A-C). In control mice,  
161 the proportional rates of oligodendrocyte addition (top:  $2.62 \pm 0.37\%$ ; bottom:  $2.93 \pm 0.26\%$  per  
162 week) were similar between the top zone ( $0\text{-}100 \mu\text{m}$ ) and bottom zone ( $200\text{-}300 \mu\text{m}$ ), despite  
163 their dramatically different oligodendrocyte densities ( $0\text{-}100 \mu\text{m}$ :  $17 \pm 2$  cells;  $200\text{-}300 \mu\text{m}$ :  $79 \pm$   
164  $10$  cells,  $N = 11$  mice @ baseline) (Figure 2D,E); the only exception was for times when no cells  
165 were incorporated into the top zone (Figure 2E,  $p = 0.0036$  @ 5 weeks, N-way ANOVA with  
166 Bonferroni correction for multiple comparisons). These findings suggest that oligodendrocyte  
167 enrichment in deeper layers occurs early in development, but then proceeds at similar rates  
168 across cortical layers in adulthood.

169 In an efficient regenerative process, cell generation would be matched to cell loss;  
170 however, we found that oligodendrocyte regeneration was not proportional to their original

171 density. Oligodendrocyte recovery was highly efficient in the top 100  $\mu\text{m}$  zone, reaching  $85.2 \pm$   
172  $0.17\%$  of the baseline oligodendrocyte population nine weeks after cuprizone, but only  $55.5 \pm$   
173  $0.11\%$  of baseline after nine weeks in the bottom 100  $\mu\text{m}$  zone (Figure 2C). The peak of this  
174 oligodendrocyte loss and replacement occurred during the first two weeks of recovery post-  
175 cuprizone (Figure 1J,K, Figure 2F,G). During this period, there was both a proportionally higher  
176 rate of cell loss and lower rate of cell replacement in the bottom 100  $\mu\text{m}$  zone compared to the  
177 upper zone (Figure 2F,G) (loss @ week 4,  $p = 0.044$ ; addition @ week 4,  $p = 0.036$ , N-way  
178 ANOVA with Bonferroni correction for multiple comparisons), indicating that the ability to  
179 balance cell loss with replacement declines with depth during this initial period. Although  
180 proportionally lower, more oligodendrocytes were generated per week in deeper layers (Figure  
181 2H, green bars) (0-100  $\mu\text{m}$ : 0.5-3.3 cells/week; 200-300  $\mu\text{m}$ : 2.8 – 7.7 cells/week,  $p = 5.82 \times 10^{-4}$   
182 @ week 4,  $p = 0.046$  @ week 5, N-way ANOVA with Bonferroni correction for multiple  
183 comparisons), but this enhanced oligodendrogenesis was not sufficient to compensate for the  
184 greater cell loss (Figure 2H, magenta bars). This relative lag in regeneration is clearly visible in  
185 maps indicating where newly generated oligodendrocytes were formed with regard to depth and  
186 their corresponding density histograms (Figure 2I, green circles and bars). This analysis  
187 highlights that the absolute number of oligodendrocytes integrated was remarkably similar in the  
188 top and bottom zones during the first few weeks of recovery, suggesting that there are factors  
189 that suppress regeneration of needed oligodendrocytes in deeper cortical layers.

190 A decrease in the pool of progenitors or formation of reactive astrocytes are potential  
191 candidates to impair oligodendrocyte regeneration in deeper cortical layers. Although OPCs are  
192 slightly less abundant in the deeper layers compared to the surface 100  $\mu\text{m}$  (Supplementary  
193 Figure 3A,C,D) ( $p = 2.084 \times 10^{-13}$ , N-way ANOVA, by depth), there was no evidence of  
194 persistent OPC depletion during recovery (Supplementary Figure 3D,F) ( $p = 0.086$ , Kruskal-  
195 Wallis one-way ANOVA). Reactive astrocytes, a known pathological feature of both the  
196 cuprizone model and cortical demyelinating lesions (Chang et al., 2012; Skripuletz et al., 2008),  
197 can impair OPC differentiation by secreting cytokines (Kirby et al., 2019; Su et al., 2011; Zhang  
198 et al., 2010), but whether reactive astrocytes impair recovery differently as a function of cortical  
199 depth is unknown. GFAP+ astrocytes are relatively rare in the deeper (200-500  $\mu\text{m}$ ) regions of  
200 cortex in naïve mice; however, following cuprizone-treatment, their number increased nearly  
201 ten-fold ( $p = 5.86 \times 10^{-16}$ , N-way ANOVA, by time-point). This enhanced GFAP expression  
202 remained elevated throughout the recovery period (Supplementary Figure 3G) ( $p = 0.006$ ,  
203 Kruskal-Wallis one-way ANOVA, with Fisher's correction for multiple comparisons) and they  
204 retained a reactive morphology, even after five weeks of recovery (Supplementary Figure



205 3A,B,E,G). In contrast, astrocytes in the surface 100  $\mu\text{m}$ , while exhibiting higher GFAP  
206 immunoreactivity at baseline, exhibited only a transient increase that was not sustained past two  
207 weeks of recovery (Supplementary Figure 3E). These findings highlight that the gliotic response  
208 to demyelination varies in magnitude and duration across the cortex, which may impair the  
209 recovery of gray matter regions with higher myelin content.

210

### 211 **Regeneration alters the pattern of myelination in the cortex**

212 Myelination patterns are distinct among different neuron classes in the cortex (Micheva et al.,  
213 2016; Stedehouder et al., 2017; Tomassy et al., 2014), and can be discontinuous, in which  
214 myelin segments along individual axons are separated by long regions of bare axon (Tomassy  
215 et al., 2014). Even these isolated myelin segments are highly stable (Hill et al., 2018; Hughes et  
216 al., 2018), suggesting that preservation of these patterns is important to support cortical  
217 function, and therefore that recreation of these patterns should be a goal of the regenerative  
218 process. We hypothesized that given the sparseness of myelination in the cortex, new  
219 oligodendrocytes generated after demyelination should be formed in locations very close to the  
220 original population. To explore the spatial aspects of oligodendrocyte replacement, we mapped  
221 the distribution of oligodendrocytes within 425  $\mu\text{m}$  x 425  $\mu\text{m}$  x 300  $\mu\text{m}$  volumes in 3-D prior to  
222 and after recovery from cuprizone, as well as the distribution of new cells generated in control  
223 mice (Figure 3A,B, green circles). Unexpectedly, these maps revealed that the cell bodies of  
224 regenerated oligodendrocytes occupied positions distinct from the original cells (see also Figure  
225 1E). To quantify displacement of newly formed oligodendrocytes from original locations, we  
226 determined the Euclidean distance between nearest neighbors (nearest neighbor distance,  
227 NND) of every oligodendrocyte in this region at baseline and at five weeks of recovery (or eight  
228 weeks in control). Small changes in cell position were observed for oligodendrocytes in control  
229 mice (Figure 3C, Stable cells); however, addition of new oligodendrocytes to the cortex over this  
230 period did not significantly alter NND (All cells vs. Stable cells, 0-300  $\mu\text{m}$ :  $p = 0.284$ , N-way  
231 ANOVA with Bonferroni correction for multiple comparisons). In contrast, regenerated  
232 oligodendrocytes added to the cortex of cuprizone-treated mice were significantly displaced  
233 relative to original locations (Figure 3C, All Cells vs. Stable cells) ( $p = 8.95 \times 10^{-7}$ , N-way  
234 ANOVA with Bonferroni correction for multiple comparisons). This apparent rearrangement of  
235 oligodendrocyte position was not due to differences in image quality or registration across the  
236 time series, or to changes in the structure of the tissue due to cuprizone exposure, as  
237 oligodendrocytes that survived in cuprizone exhibited the same average displacement as cells  
238 in control mice over the course of eight weeks of imaging (Figure 3C, Stable cells, Control vs.

239 Regenerated,  $p > 0.05$ , N-way ANOVA with Bonferroni correction for multiple comparisons).  
240 This increase in NND was also not due to incomplete recovery from demyelination, as NND in  
241 the upper zone (0-100  $\mu\text{m}$ ) was greater than the average NDD across the whole volume (0-300  
242  $\mu\text{m}$ ), despite the proportionally greater regeneration in layer I (Figure 2C). These results  
243 demonstrate that regenerated oligodendrocytes occupy locations within the parenchyma that  
244 are distinct from those present at baseline, and therefore may establish a new pattern of  
245 myelination.

246 The new locations of oligodendrocytes after a demyelinating event may not preclude  
247 these cells from myelinating the same axonal segments, as cortical oligodendrocytes can  
248 extend long cytoplasmic processes to form sheaths distant from the cell body (Chong et al.,  
249 2012; Murtie, Macklin, & Corfas, 2007). To determine whether regenerated oligodendrocytes  
250 restore the pattern of myelination by extending longer processes, we reconstructed their  
251 complete morphologies and compared these to oligodendrocytes generated at the same age in  
252 control mice. For new oligodendrocytes that appeared in layer I in control (10 cells, N = 3 mice)  
253 or cuprizone-treated mice (9 cells, N = 3 mice), each process extending from the cell body and  
254 every myelin sheath connected to these processes were traced when the cells first appeared in  
255 the imaging volume (Figure 3D), and for every 2 - 3 days for up to 14 days. In both control and  
256 cuprizone treated mice, newly generated oligodendrocytes exhibited an initial period of  
257 refinement after first appearance (governed by the onset of *Mobp* promoter activity and EGFP  
258 accumulation in the cytoplasm), characterized by sheath extensions and retractions  
259 (Supplementary Fig. 4A-D), pruning of entire myelin sheaths and removal of cytoplasmic  
260 processes (Supplementary Fig. 4E-H), before reaching a stable morphology (Supplementary  
261 Fig. 4I,J). The final position of the cytoplasmic process along the length of the sheaths (the likely  
262 point of sheath initiation) was randomly distributed along the length of the internode  
263 (Supplementary Fig. 4K,L). Notably, the initial dynamics of these newly formed oligodendrocytes  
264 are remarkably similar to those described in the developing zebrafish spinal cord (Auer,  
265 Vagionitis, & Czopka, 2018; Czopka, Ffrench-Constant, & Lyons, 2013), suggesting that the  
266 developmental sequence of oligodendrocytes is both highly conserved and cell intrinsic.

267 This time-lapse analysis revealed that the morphological plasticity of newly formed  
268 oligodendrocytes lasts for more than one week in the cortex (Supplementary Figure 4I,J);  
269 therefore, comparisons between control and regenerated oligodendrocytes were made from  
270 cells 12-14 days after first appearance when they reached their mature form. Although  
271 regenerated oligodendrocytes had access to much more axonal territory, they produced similar  
272 numbers of sheaths (Figure 3E) (Control:  $53 \pm 3$  sheaths, 10 cells, N = 3 mice; Regenerated: 51



273  $\pm 2$  sheaths, 9 cells,  $N = 3$  mice,  $p = 0.628$ , unpaired two-tailed t-test). However, regenerated  
274 cells formed more total myelin (Figure 3F) (Total sheath length: Control,  $3.17 \pm 0.16$  mm;  
275 Regenerated:  $3.80 \pm 0.23$  mm,  $p = 0.041$ , unpaired two-tailed t-test) by extending slightly longer  
276 sheaths (Figure 3G) (average sheath length: Control,  $62.6 \pm 2.6$   $\mu\text{m}$ ; Regenerated,  $72.3 \pm 2.2$   
277  $\mu\text{m}$ ,  $p = 0.012$ , unpaired two-tailed t-test), despite having similar distributions of sheath lengths  
278 (Figure 3H).

279 If regenerated oligodendrocytes reach the same axonal regions from a greater distance  
280 away, their processes should be more polarized; however, 2-D maps of sheaths arising from  
281 single cells, revealed that they exhibited a similar radial morphology (Figure 3D). To obtain a  
282 quantitative measure of polarization, vectors were calculated from the cell body to each  
283 paranode (Figure 3I) and mean radial histograms for new and remyelinating cells were  
284 calculated (Figure 3J). The average extent of polarization for control and regenerated cells was  
285 not significantly different from uniformly radial (Control,  $-0.047 \pm 1.30$  (std) rad,  $p = 0.400$ ;  
286 Regenerated,  $0.076 \pm 1.30$  (std) rad,  $p = 0.256$ , Hodges-Ajne test of non-uniformity) and  
287 sheaths of new cells in control and those regenerated after cuprizone exhibited similar degrees  
288 of circularity ( $p > 0.1$ ,  $k = 462$ , Kuiper two-sample test). Thus, regenerated oligodendrocytes  
289 formed in an environment with greater myelination targets have morphologies remarkably  
290 similar to cells added to existing myelinated networks in naïve mice, suggesting that  
291 oligodendrocyte structure is shaped by strong cell intrinsic mechanisms.

292 To estimate the extent of myelin sheath recovery in the somatosensory cortex, we  
293 measured the overlap in cell territory between baseline and regenerated cells. Territories of  
294 individual oligodendrocytes which existed at baseline, those generated in control, and those  
295 regenerated following cuprizone were estimated using an ellipsoid centered at the center of  
296 mass of the sheath arbor with the smallest radii in the x-y (oriented parallel to the pia) and z  
297 planes (oriented perpendicular to pia) that encompassed at least 80% of the total sheath length.  
298 These radii were averaged across all cells per condition to generate model ellipsoids (Figure  
299 4A), representing the volume available to be myelinated by an individual oligodendrocyte. As  
300 expected from the slightly longer myelin sheaths produced by remyelinating cells, their average  
301 cell territory was significantly larger than control cells (Figure 4B) (x-y; Control:  $75.7 \pm 2.1$   $\mu\text{m}$ ;  
302 Regenerated:  $85.2 \pm 2.8$   $\mu\text{m}$ ,  $p = 0.025$ , one-way ANOVA). Model ellipsoids were then centered  
303 on the cell body coordinates in layer I from control and cuprizone-treated mice (examples shown  
304 in Figure 4C,D) and their degree of territory overlap determined. This analysis revealed that  
305 regenerated oligodendrocytes in cuprizone exposed mice exhibit only  $59.1 \pm 5.8$  % territory  
306 overlap (Range: 37.2 – 79.0%,  $N = 6$ ) with oligodendrocytes that originally populated these

307 regions of the cortex. This convergence was slightly, but not significantly, higher than predicted  
308 if the same number of regenerated cells were placed at random in the volume ( $44.3 \pm 4.7\%$ ;  $p =$   
309  $0.078$  by t-test) (Figure 4E), suggesting that local factors may influence which progenitors  
310 differentiate. Moreover, because regenerated cell territories were larger (Figure 4B), they  
311 enclosed an average volume of  $116 \pm 14.1\%$  of the total territory at baseline (Range:  $87.4 -$   
312  $181\%$ ) (Figure 4F). These data and those obtained from the NND analysis indicate that although  
313 regenerated oligodendrocytes tend to be formed close to the sites of original cells, they  
314 unexpectedly do not completely overlap with the baseline territory; thus, regenerated  
315 oligodendrocytes are unlikely to access to the same complement of axons to myelinate, and  
316 could potentially myelinate novel axon segments.

317

### 318 **Regeneration of specific myelin segments**

319 Although oligodendrocytes are formed in new locations during recovery from demyelination,  
320 they have the opportunity to regenerate specific myelin sheaths in areas where they extend  
321 processes into previously myelinated territories. To assess the extent of sheath replacement in  
322 the somatosensory cortex, we acquired high resolution images in layer I in *Mobp-EGFP* mice,  
323 allowing assessment of the position and length of individual myelin internodes. We randomly  
324 selected  $100 \mu\text{m} \times 100 \mu\text{m} \times 100 \mu\text{m}$  volumes in the image stacks ( $425 \mu\text{m} \times 425 \mu\text{m} \times 100 \mu\text{m}$ ),  
325 and traced the full length of internodes that entered the volume at baseline and at the five-week  
326 recovery time point in control ( $N = 5$ ) and cuprizone-treated mice ( $N = 5$ ) (Figure 5A). Internodes  
327 were classified as *stable* (supplied by the same cell at baseline and recovery), *lost* (present at  
328 baseline and absent in recovery), *replaced* (present at baseline, lost and then replaced by a  
329 new cell), or *novel* (not present at baseline, but present in recovery). Consistent with previous  
330 findings (Hill et al., 2018; Hughes et al., 2018), in control mice almost all internodes ( $99.1 \pm 0.5$   
331 %) present at baseline remained after five weeks (Figure 5A, gray processes), demonstrating  
332 the high stability of myelin sheaths within the cortex. Generation of new oligodendrocytes within  
333 this area led to the appearance of a substantial proportion ( $25.8 \pm 8.7 \%$ ) of novel sheaths  
334 (Figure 5A, green processes). In mice treated with cuprizone,  $84.4 \pm 2.7\%$  of myelin sheaths  
335 were destroyed in this region (Figure 5B), but sheath numbers were restored to baseline levels  
336 after five weeks (Figure 5C). However, despite this apparent recovery of overall myelin content,  
337 only  $50.5 \pm 2.9\%$  of specific internodes were replaced,  $32.4 \pm 1.2\%$  were lost (not replaced) and  
338  $47.6 \pm 9.9 \%$  novel internodes were formed ( $N = 5$  mice) (Figure 5D), indicating that  
339 regeneration leads to a dramatic change in the overall pattern of myelin within cortical circuits.

340 Analysis of single oligodendrocytes revealed that the degree of sheath replacement  
341 varied considerably between regions. Oligodendrocytes regenerated in regions that originally  
342 had a high density of sheaths devoted a larger proportion of their sheaths to replacement ( $R^2 =$   
343  $0.4232$ , 13 cells,  $N = 4$  mice) (Figure 5E,F). This phenomenon was most evident in cells that  
344 traversed boundaries of low and high myelin density. Nevertheless, rather than extending all  
345 processes into the previously highly myelinated area, they retained a radial morphology (Fig.  
346 3I); processes that extended into densely myelinated areas often formed sheaths on previously  
347 myelinated axons, while processes that extended into the sparsely myelinated area typically  
348 formed novel sheaths (Figure 5E,F). These results suggest that remyelination may be  
349 opportunistic and based, at least initially, on chance interactions between processes and local  
350 axon segments. This finding is consistent with the highly radial morphology of premyelinating  
351 oligodendrocytes (Trapp, Nishiyama, Cheng, & Macklin, 1997), which would be optimized for  
352 local search of the surrounding volume rather than directed, regional targeting of subsets of  
353 axons.

354 Myelination patterns along axons in the cortex are highly variable, ranging from  
355 continuous to sparsely myelinated in the same region (Hill et al., 2018; Hughes et al., 2018;  
356 Micheva et al., 2016; Tomassy et al., 2014). To determine if there is a preference for replacing  
357 specific types of sheaths during recovery from demyelination, we classified sheaths present at  
358 baseline according to their neighbors: 0 neighbors within  $5 \mu\text{m}$  (*isolated*), one node of Ranvier  
359 (NOR) and one hemi-node (*1 neighbor*), or two NORs (*2 neighbors*) (Figure 6A,B;  
360 Supplementary Videos 4,5). In control mice this pattern was highly stable, with similar  
361 proportions of isolated and neighbored sheaths at baseline and eight weeks later (Figure 6C), a  
362 pattern that we showed previously is stable through middle-age (Hughes et al., 2018). Indeed,  
363 novel sheaths generated by new oligodendrocytes made roughly equal proportions of isolated  
364 and neighbored sheaths (Figure 6D), indicating that new sheaths were added to previously-  
365 unmyelinated axons, as well as next to existing sheaths on myelinated axons, visible as higher  
366 values in the upper right quadrant (relative to lower left quadrant) of the myelination matrix  
367 (Figure 6E). We then assessed the extent of sheath replacement five weeks after the end of  
368 cuprizone. Similar to that observed in control, oligodendrocytes in cuprizone-treated mice had  
369 similar proportions of isolated and neighbored sheaths as they did at baseline (Figure 6F). While  
370 lost (not replaced) and novel internodes exhibited both isolated and neighbored sheaths with  
371 equal proportion, the majority of replaced internodes had at least one neighbor ( $79.5 \pm 2.5 \%$ )  
372 (Figure 6G), visible in the bias towards higher values in the lower right quadrant in the  
373 myelination matrix (Figure 6H). These data suggest that regenerated oligodendrocytes

374 preferentially formed sheaths on axons that were previously more heavily myelinated,  
375 suggesting that the factors which promote greater myelination of specific axons is preserved  
376 after demyelination.

377 Analysis of individual sheath position revealed the remarkable spatial specificity with  
378 which sheaths were replaced. For both isolated sheaths and those along continuously  
379 myelinated segments, sheaths were often formed close to the same position along axons,  
380 resulting in NOR or hemi nodes at similar positions (Figure 7A, Supplementary Video 6). These  
381 results suggest that there may be persistent landmarks along axons indicating the prior position  
382 of nodes after myelin is removed (Figure 7B). To assess whether nodal components along  
383 cortical axons remain after demyelination, we performed post-hoc immunostaining on tissue  
384 from mice exposed to cuprizone for six weeks (longer than three weeks used above, to increase  
385 the length of time that axons were devoid of myelin) with antibodies against Caspr,  $\beta$ IV-spectrin,  
386 and Ankyrin-G, which together label paranodal and nodal regions along myelinated axons  
387 (Susuki, Otani, & Rasband, 2016). High resolution z-stacks ( $135\ \mu\text{m} \times 135\ \mu\text{m} \times 30\ \mu\text{m}$ ,  $2048 \times$   
388  $2048$  pixels) of layer V-VI were acquired in order to capture a large population of nodes (Figure  
389 7C,D), as the upper layers of cuprizone-treated mice had inadequate numbers for quantification  
390 at this magnification. The full images were transformed into surfaces to allow automated  
391 quantification (see Methods) (Figure 7E,F).  $\beta$ IV-spectrin puncta were classified as “nodes” if  
392 they were flanked by Caspr+ puncta, “heminodes” if they were bound by only one side by  
393 Caspr, and “isolated” if no flanking Caspr was visible (Figure 7B). As expected, the distribution  
394 of nodes among these categories remained stable in control mice over two weeks (Figure 7G).  
395 In contrast, the characteristics of nodes changed dramatically after exposure to cuprizone, with  
396 a loss of nodes visible at four weeks, a time when ~50% of oligodendrocytes had degenerated  
397 (Figures 1I, 7G). After six weeks in cuprizone, few Caspr+ puncta remained, and  
398 correspondingly there were few nodes or heminodes (Figure 7F,G). However, even at this later  
399 time point, many  $\beta$ IV-spectrin+ puncta were visible, with the greatest proportion of these  
400 isolated from Caspr, suggesting that  $\beta$ IV-spectrin remains clustered for a prolonged period,  
401 consistent with the hypothesis that many represent previous nodes (i.e. previously flanked by  
402 Caspr). Thus, although prior studies suggest that NOR components are rapidly disassembled  
403 and redistributed after demyelination (Coman et al., 2006; Craner et al., 2004; Dupree et al.,  
404 2004), these results indicate that  $\beta$ IV-spectrin, which links the underlying actin cytoskeleton to  
405 integral membrane proteins within the node/paranode, remains clustered along axons, which  
406 may provide the means to confine sheath extension to previously myelinated regions and allow  
407 precise restoration of myelin sheath position during regeneration.

408

409 **DISCUSSION**

410

411 The organization of myelin in the cerebral cortex is remarkably diverse, with densities of myelin  
412 sheaths varying between cortical regions, between axons from different classes of neurons and  
413 even along individual axons within a given area. These patterns are established progressively  
414 over many months, creating an extended developmental time course that results in pronounced  
415 increases in myelin through adolescence and adulthood. Although progressive,  
416 oligodendrogenesis and myelination can be enhanced by life experience and may be critical to  
417 certain forms of learning (Gibson et al., 2014; Hughes et al., 2018; McKenzie et al., 2014).  
418 However, once formed, oligodendrocytes and their complement of myelin sheaths are  
419 extraordinarily stable, with cell survival and sheath position varying little over months and are  
420 resistant to environmental changes such as sensory enrichment, in accordance with the high  
421 stability of myelin proteins and the persistence of oligodendrocytes in the human CNS (Yeung et  
422 al., 2014). Experience dependent changes in myelin appear to occur primarily through addition  
423 of new sheaths arising from oligodendrogenesis (Hughes et al., 2018), but see also (Dutta et al.,  
424 2018; Gibson et al., 2014). The high stability of oligodendrocytes and their preferential  
425 myelination of specific neurons, such as parvalbumin interneurons in layers II/III (Micheva et al.,  
426 2016; Stedehouder et al., 2017), suggest that preserving the overall pattern of myelin is  
427 important to optimize and sustain the processing capabilities of these circuits. Consistent with  
428 this hypothesis, demyelination within the cortex in diseases such as MS is closely associated  
429 with cognitive impairment and increased morbidity. Moreover, many neurodegenerative  
430 diseases and affective disorders are associated with profound alterations in myelin (Gouw et al.,  
431 2008; Ihara et al., 2010; Stedehouder & Kushner, 2017), and recent studies indicate that  
432 demyelination triggers a dramatic decrease in excitatory synapses (Araújo et al., 2017;  
433 Werneburg et al., 2020), suggesting that disruptions in these sheaths may also influence both  
434 structural and functional aspects of circuits. Although preserving cortical myelination appears  
435 paramount, the highly variable patterns of myelin within cortical circuits and the sparseness of  
436 these neuron-glia associations create considerable challenges for regenerating specific myelin  
437 sheaths after injury or disease.

438 Here, we used two photon *in vivo* imaging to examine the destruction and regeneration  
439 of oligodendrocytes and myelin sheaths in cortical circuits of adult mice. These longitudinal, high  
440 resolution studies revealed features of the regenerative process in the cortex that were not  
441 previously known. First, oligodendrocytes were regenerated in new locations, yet had similar

442 morphologies. Second, regenerated oligodendrocytes often formed sheaths along portions of  
443 axons that were previously unmyelinated, establishing a new pattern of myelination. Third,  
444 oligodendrocyte regeneration was not uniform across the cortex and became less efficient with  
445 depth from the cortical surface, in concert with the increasing density of myelin (prior to  
446 oligodendrocyte destruction) and enhanced gliosis. Fourth, in areas of territory overlap,  
447 regenerated oligodendrocytes were able to establish sheaths at similar positions along  
448 previously myelinated axons, indicating that positional cues persist along axons long after  
449 demyelination. Together, these findings reveal unexpected aspects of cortical remyelination,  
450 raising new questions about the mechanisms that impair oligodendrocyte regeneration in  
451 deeper cortical layers, the mechanisms that enable oligodendrocytes to identify and replace  
452 individual myelin sheaths and the long-term consequences of circuit level changes in  
453 myelination patterns.

454

#### 455 **Regenerative potential of cortical OPCs**

456 In regenerative processes, cell loss and cell generation are typically closely coupled, helping to  
457 ensure efficient replacement without energetically costly production of excess cells and further  
458 tissue disruption (Biteau, Hochmuth, & Jasper, 2011). If this scenario were to prevail in the  
459 CNS, the generation of new oligodendrocytes should be proportional to those lost, with much  
460 higher oligodendrocyte production occurring in deeper layers. However, our results indicate that  
461 oligodendrocyte replacement was remarkably constant across layers for many weeks after a  
462 demyelinating event (Figure 2G-I), with regeneration in deeper layers lagging behind that  
463 predicted for one-to-one replacement. This phenomenon could be explained if local  
464 environmental factors in deeper layers suppress OPC differentiation. The larger number of  
465 oligodendrocytes that degenerate in this area may inhibit regeneration by creating more  
466 inflammation and myelin debris, factors known to suppress oligodendrogenesis. Consistent with  
467 this hypothesis, reactive gliosis was more prominent and more prolonged in deeper layers of  
468 cortex (Supplementary Figure 3A,B,E,G). Nevertheless, even after extended recovery (> 9  
469 weeks), oligodendrocyte density remained much lower in these regions than present at  
470 baseline. This regional suppression of oligodendrogenesis is particularly apparent when  
471 assessing the rate of cell addition, as the initial burst in oligodendrogenesis that occurs just  
472 following cell loss is not sustained despite the remaining cell deficit (Figure 2G-I). We predict  
473 that it would take approximately three additional months for the oligodendrocyte population to be  
474 fully regenerated, but this is only possible if a higher rate of oligodendrogenesis (~3.5%) than  
475 observed in age-matched control brains (1.7%) is maintained. However, it is not clear whether



476 the endogenous pool of OPCs could maintain this higher rate of differentiation (and resulting  
477 homeostatic OPC turnover) required for such a prolonged period of replacement. Although  
478 recent studies indicate that GLI1-expressing glial progenitors positioned within germinal zones  
479 along the lateral ventricles are mobilized in response to cuprizone-induced demyelination,  
480 forming new OPCs that migrate and differentiate into oligodendrocytes with higher probability  
481 than resident OPCs (Samanta et al., 2015), our results indicate that this recruitment is not  
482 sufficient in the short term to overcome existing inhibitory barriers within cortical gray matter.

483 The inability to recover fully from a demyelinating event raises the possibility that  
484 inflammation persists long after the initial trauma, or that OPCs in these regions are  
485 permanently altered as a result of exposure to this environment, if only for a short time (Baxi et  
486 al., 2015; Kirby et al., 2019). Like other progenitor cells, OPCs exhibit a decline in regenerative  
487 potential with age and can undergo senescence, a process that may be accelerated by  
488 exposure to inflammatory cytokines (Kirby et al., 2019; Neumann et al., 2019; Nicaise et al.,  
489 2019). It is also possible that there is a restricted time period during which OPCs can detect and  
490 respond to myelin loss; if there are inherent limits on OPC mobilization, as suggested by the  
491 uniform behavior of OPCs across cortical layers, then the inability to match the demand for new  
492 cells early may lead to prolonged deficits. In this regard, evidence that certain aspects of the  
493 inflammatory response strongly promote OPC differentiation (Kotter, Li, Zhao, & Franklin, 2006;  
494 Miron et al., 2013; Ruckh et al., 2012) raises the possibility that there is a critical time window  
495 for optimal repair. A more detailed spatial and cell-type specific profiling of inflammatory  
496 changes in the cortex after oligodendrocyte death may help clarify the role of inflammatory  
497 changes in this impaired regeneration.

498 An unexpected feature of oligodendrocyte regeneration in the cortex was that new cells  
499 were not formed in the same locations as the prior oligodendrocytes, even though the high  
500 density, regular spacing and dynamic motility of OPCs seem ideally suited to optimize  
501 placement of new oligodendrocytes. Inhibitory factors generated as a consequence of  
502 oligodendrocyte degeneration, such as myelin debris (Kotter et al., 2006), axonally expressed  
503 factors (LINGO1) (Mi et al., 2005), extracellular matrix components (chondroitin sulfate  
504 proteoglycans) (Lau et al., 2012), and reactive astrocytes (Back et al., 2005) may create a local  
505 zone of exclusion at sites of cell death reducing the probability of OPC differentiation.

506 Complete reconstruction of individual oligodendrocytes revealed that regenerated cells  
507 underwent a similar period of structural refinement over a period of ~ 10 days and ultimately  
508 formed a comparable number of sheaths (Figure 3D,E, Supplementary Figure 4A-J). Although  
509 oligodendrocytes have the capacity to form long processes, they did not always extend their

510 cytoplasmic processes to reach sites of original myelination, instead creating sheaths within a  
511 local territory similar to that of normal oligodendrocytes (Figure 3D,I), with only a 15.5%  
512 increase in total sheath length (Figure 3F). As regenerated oligodendrocytes are formed in an  
513 environment with an apparent surplus of receptive axons, these findings suggest that the size  
514 and shape of oligodendrocytes is profoundly limited by cell intrinsic mechanisms.

515

### 516 **Reparative potential of surviving oligodendrocytes**

517 Recent studies of postmortem human tissue from MS patients have raised the intriguing  
518 possibility that remyelination may occur through the reformation of myelin sheaths by  
519 oligodendrocytes that survive autoimmune attack, rather than from *de novo* oligodendrogenesis  
520 (Yeung et al., 2019). This hypothesis is based on evidence that “shadow plaques”, which are  
521 classically considered to represent partially remyelinated axons (Lassmann, Brück, Lucchinetti,  
522 & Rodriguez, 1997), did not appear to contain many newly born oligodendrocytes, as assessed  
523 using C<sup>14</sup>-based birth dating; the progressive decline in atmospheric C<sup>14</sup> levels following the  
524 cessation of atomic testing in the 1950s allow the date of last cell division to be estimated the  
525 amount of C<sup>14</sup> present. Although *in vivo* imaging studies indicate that oligodendrocytes can be  
526 generated through direct differentiation of OPCs without cell division (Hughes et al., 2013),  
527 potentially confounding measures of cell age based on proliferation, these results nevertheless  
528 posit that significant new myelin can be created by existing oligodendrocytes. In our studies, the  
529 few oligodendrocytes that survived cuprizone did not contribute substantial new myelin.  
530 However, the cuprizone model does not fully recapitulate the pathology of cortical lesions  
531 observed in MS. In particular, demyelination of the upper layers of the cortex in autopsy  
532 samples from MS patients are correlated with regions of leptomeningeal inflammation,  
533 composed of B and T cells that secrete cytotoxic cytokines and create a complex inflammatory  
534 milieu (Howell et al., 2011; Roberta Magliozzi et al., 2007). Whether a cell-mediated immune  
535 response, local release of cytotoxic compounds or environmental changes substantially shift the  
536 burden of repair from OPCs to surviving oligodendrocytes in human MS remains to be explored.

537

### 538 **Specificity of myelin repair**

539 The regeneration of oligodendrocytes in different locations and the strong, cell intrinsic control of  
540 cell size appear to constrain where myelin sheaths are formed. However, when a regenerated  
541 oligodendrocyte had access to a territory that was previously myelinated, it was capable of  
542 establishing sheaths along axons that were previously myelinated, indicating that the local  
543 factors which initially influenced axon selection were retained after demyelination. In these

544 regions, myelin sheaths were often reformed at a similar position along axons, even when  
545 sheaths were isolated from neighboring sheaths and therefore could have extended over a  
546 much larger area. Although previous studies suggest that components of the NOR are  
547 redistributed after demyelination in the PNS (England, Gamboni, Levinson, & Finger, 1990) and  
548 in MS lesions (Coman et al., 2006; Craner et al., 2004; Dupree et al., 2004), our studies reveal  
549 that  $\beta$ IV-spectrin, which forms a complex with Ankyrin-G to link voltage-gated sodium channels  
550 to the actin cytoskeleton at NORs (Susuki et al., 2016), remains clustered (without flanking  
551 myelin sheaths) with continued administration of cuprizone for up to six weeks (Figure 7D,F),  
552 suggesting that axonal guideposts remain for many weeks after demyelination. As these studies  
553 were performed using post-hoc immunostaining, we do not yet know if these  $\beta$ IV-spectrin  
554 puncta are located at previous nodal positions; future longitudinal studies using fluorescently  
555 tagged nodal components will help define the stability of NORs after demyelination. The time  
556 course over which these components are removed from demyelinated axons could influence the  
557 subsequent distribution of myelin, with prolonged demyelinating injuries leading to greater loss  
558 of remyelination specificity. Stabilizing the structural elements of previously myelinated axonal  
559 domains could therefore represent a potential target for remyelinating therapies.

560 Because territory overlap between original and regenerated oligodendrocytes was only  
561 ~60%, considerable new axonal territory was accessed during the reparative period, leading to  
562 novel sheaths that altered the global pattern of cortical myelin. However, even in areas where  
563 the territories of regenerated and original oligodendrocytes overlapped, new myelin sheaths  
564 were often formed on portions of axons that were not previously myelinated. These findings  
565 highlight the probabilistic nature of myelination, which is influenced by many dynamic factors,  
566 such as neural activity, axon size and metabolic state that could alter target selection and  
567 stabilization of nascent sheaths (Klingseisen et al., 2019).

568

### 569 **Implications for myelin repair and cognitive function**

570 Oligodendrocytes perform crucial roles in the CNS, enhancing the propagation of action  
571 potentials and reducing the metabolic cost to do so, providing metabolic support for axons far  
572 removed from their cell bodies and controlling excitability by influencing the distribution of  
573 voltage-gated channels and promoting clearance of extracellular potassium. Thus, the  
574 reorganization of myelin that occurs in cortical circuits during regeneration may have profound  
575 functional consequences on cognition and behavior. It will be important to determine whether  
576 these functional aspects of oligodendrocyte-neuron interactions are restored following  
577 remyelination. Our studies focused exclusively on regeneration in the somatosensory cortex of

578 young adult mice. It is not yet known if these changes mimic regeneration in other cortical  
579 regions, or if the spatial and temporal aspects of myelin replacement in the cortex vary with age.  
580 Moreover, due to limitations in resolving sheaths in deeper layers of the cortex, we do not yet  
581 know whether regeneration deficits extend to layers IV-VI. It will also be critical to define the  
582 spatial and temporal changes in myelin sheath thickness, as this varies considerably between  
583 different axons and has been shown to be a substrate for plasticity in the cortex (Gibson et al.,  
584 2014).

585 Our analysis was restricted to discrete volumes in the cortical mantle. As we are not yet  
586 able to monitor myelination patterns along the entire length of individual axons, it is possible that  
587 the position of sheaths may change after regeneration, but that the overall myelin content along  
588 a given axon is conserved. Alternatively, from a functional standpoint, it may not be necessary  
589 to reform the precise pattern of myelination, as long as the relative amount of myelin along  
590 different classes of neurons is preserved. At present, our ability to predict the consequences of  
591 these changing myelin patterns and the spatial differences in oligodendrocyte regeneration are  
592 limited by our knowledge about the function of myelin in cortical gray matter. As recent studies  
593 suggest that even subtle changes in oligodendrogenesis can alter behavioral performance  
594 (McKenzie et al., 2014; Xiao et al., 2016), the impact of these changes may be profound. The  
595 ability to monitor the regeneration of myelin sheaths with high spatial and temporal resolution *in*  
596 *vivo* within defined circuits provides new opportunities to evaluate the effectiveness of potential  
597 therapeutic interventions (Deshmukh et al., 2013; Early et al., 2018; Mei et al., 2014; Rankin et  
598 al., 2019) and a platform to explore the functional consequences of myelin reorganization.

599

600

## 601 **MATERIALS AND METHODS**

602

### 603 **Animal care and use**

604 Female and male adult mice were used for experiments and randomly assigned to experimental  
605 groups. All mice were healthy and did not display any overt behavioral phenotypes, and no  
606 animals were excluded from the analysis. Generation and genotyping of BAC transgenic lines  
607 from *Mobp-EGFP* (Gensat) (Hughes et al., 2018) have been previously described. Mice were  
608 maintained on a 12-h light/dark cycle, housed in groups no larger than 5, and food and water  
609 were provided *ad libitum* (except during cuprizone-administration, see below). All animal  
610 experiments were performed in strict accordance with protocols approved by the Animal Care  
611 and Use Committee at Johns Hopkins University.

612

### 613 **Cranial Windows**

614 Cranial windows were prepared as previously described (Holtmaat et al., 2012; Hughes et al.,  
615 2018). Briefly, mice 7 to 10 weeks old were anesthetized with isoflurane (induction, 5%;  
616 maintenance, 1.5-2%, mixed with 0.5L/min O<sub>2</sub>), and their body temperature was maintained at  
617 37° C with a thermostat-controlled heating plate. The skin over the right hemisphere was  
618 removed and the skull cleaned. A 2 x 2 or 3 x 3 mm region of skull over somatosensory cortex (-  
619 1.5 mm posterior and 3.5 mm lateral from bregma) was removed using a high-speed dental drill.  
620 A piece of cover glass (VWR, No. 1) was placed in the craniotomy and sealed with VetBond  
621 (3M), then dental cement (C&B Metabond) and a custom metal plate with a central hole was  
622 attached to the skull for head stabilization.

623

### 624 ***In vivo* two photon microscopy**

625 *In vivo* imaging sessions began 2 to 3 weeks after cranial window procedure (Baseline). After  
626 the baseline imaging session, mice were randomly assigned to cuprizone or control conditions.  
627 During imaging sessions, mice were anesthetized with isoflurane and immobilized by attaching  
628 the head plate to a custom stage. Images were collected using a Zeiss LSM 710 microscope  
629 equipped with a GaAsP detector using a mode-locked Ti:sapphire laser (Coherent Ultra) tuned  
630 to 920 nm. The average power at the sample during imaging was < 30 mW. Vascular landmarks  
631 were used to identify the same cortical area over longitudinal imaging sessions. Image stacks  
632 were 425 μm x 425 μm x 110 μm (2048 x 2048 pixels, corresponding to cortical layer I, Zeiss  
633 20x objective) , 425 μm x 425 μm x 550 μm (1024 x 1024 pixels) or 850 μm x 850 μm x 550 μm  
634 (1024 x 1024 pixels; corresponding to layers I – IV), relative the cortical surface. Mice were  
635 imaged every 1 to 7 days, for up to 15 weeks.

636

### 637 **Cuprizone administration**

638 At 9 to 11 weeks of age, male and female *Mobp-EGFP* mice were fed a diet of milled, irradiated  
639 18% protein rodent diet (Teklad Global) alone (control) or supplemented with 0.2% w/w  
640 bis(cyclohexanone) oxaldihydrazone (Cuprizone, Sigma-Aldrich) in custom gravity-fed food  
641 dispensers for 3 to 6 weeks. Both control and experimental condition mice were returned to  
642 regular pellet diet during the recovery period (Baxi et al., 2017).

643

### 644 **Immunohistochemistry**

645 Mice were deeply anesthetized with sodium pentobarbital (100 mg/kg b.w.) and perfused  
646 transcardially with 4% paraformaldehyde (PFA in 0.1 M phosphate buffer, pH 7.4). Brains were  
647 then post-fixed in 4% PFA for 12 to 18 hours, depending on antibody sensitivity to fixation,  
648 before being transferred to a 30% sucrose solution (in PBS, pH 7.4). For horizontal sections,  
649 cortices were flat-mounted between glass slides and postfixed in 4% PFA for 6 to 12 hours at 4°  
650 C, transferred to 30% sucrose solution (in PBS, pH 7.4). Tissue was stored at 4° C for more  
651 than 48 h before sectioning. Brains were extracted, frozen in TissueTek, sectioned (-1.5 mm  
652 posterior and 3.5 mm lateral from bregma) at 30 to 50 µm thickness on a cryostat (Thermo  
653 Scientific Microm HM 550) at -20° C. Immunohistochemistry was performed on free-floating  
654 sections. Sections were preincubated in blocking solution (5% normal donkey serum, 0.3%  
655 Triton X-100 in PBS, pH 7.4) for 1 or 2 hours at room temperature, then incubated for 24 to 48  
656 hours at 4° C or room temperature in primary antibody (listed in Key Resources Table).  
657 Secondary antibody (see Key Resources Table) incubation was performed at room temperature  
658 for 2 to 4 hours. Sections were mounted on slides with Aqua Polymount (Polysciences). Images  
659 were acquired using either an epifluorescence microscope (Zeiss Axio-imager M1) with  
660 Axiovision software (Zeiss) or a confocal laser-scanning microscope (Zeiss LSM 510 Meta;  
661 Zeiss LSM 710; Zeiss LSM 880). For glial cell counts, individual images of coronal sections  
662 were quantified by a blinded observer for number of NG2+, GFAP+ and GFP+ cells within a 425  
663 µm x 500 µm region, and divided into 425 µm x 100 µm zones from the pial surface  
664 (Supplementary Figure 1). Immunostaining for nodal components was performed as above,  
665 except mice were transcardially perfused with PBS only and post-fixed in 4% PFA for 50  
666 minutes.

667

### 668 **Image processing and analysis**

669 Image stacks and time series were analyzed using FIJI/ImageJ. For presentation in figures,  
670 image brightness and contrast levels were adjusted for clarity. Myelin sheath images were  
671 additionally de-noised with a 3-D median filter (radius 0.5 to 1.5 pixels). Longitudinal image  
672 stacks were registered using FIJI plugin “Correct 3D Drift” (Parslow, Cardona, & Bryson-  
673 Richardson, 2014) and then randomized for analysis by a blinded observer.

674

### 675 **Cell tracking**

676 Individual oligodendrocytes were followed in four dimensions using custom FIJI scripts (Hughes  
677 et al., 2018) or with SyGlass (IstoVisio) virtual reality software by defining individual EGFP+ cell  
678 bodies at each time point, recording xyz coordinates, and defining cellular behavior (new, lost,



679 or stable cells). Oligodendrocytes that were characterized as “lost” initially lost EGFP signal in  
680 processes and myelin sheaths, before complete loss of signal from the cell body position. A  
681 “new” oligodendrocyte appeared with novel processes and internodes absent in baseline  
682 images. Dynamics of cell body positions were analyzed with custom MATLAB scripts, and  
683 cross-time point comparisons of 3-D coordinates were corrected by adding the average vector  
684 of movement of all cells between those timepoints (to account for imperfect image registration  
685 and expansion/contraction of brain volume over time). For quantification between different 100  
686  $\mu\text{m}$  depths, cells were binned between planes horizontal to the plane of the pia, and included  
687 cells were found by Delaunay triangulation.

688

### 689 **Myelin sheath analysis**

690 Registered longitudinal *in vivo* Z-stacks collected from *Mobp-EGFP* mice were acquired using  
691 two-photon microscopy. Similar to that described previously (Hughes et al., 2018), all myelin  
692 sheaths within a volume of 100  $\mu\text{m}$  x 100  $\mu\text{m}$  x 100  $\mu\text{m}$  from the pial surface were traced in FIJI  
693 using Simple Neurite Tracer (Longair, Baker, & Armstrong, 2011) at the baseline or final  
694 recovery time-point. Then, using registered time-series images from baseline to final recovery  
695 time-point, each myelin sheath was categorized as having 0, 1 or 2 myelin sheath neighbors  
696 (Figure 4), whether it was stable (connected via cytoplasmic process to same cell at baseline  
697 and at 5 weeks recovery), lost (present at baseline, but not at 5 weeks recovery), replaced ( $\geq$   
698 50% of the original sheath length was replaced by a sheath connected *via* cytoplasmic process  
699 to a regenerated oligodendrocyte), or novel (a sheath not present at baseline that was  
700 connected to a regenerated oligodendrocyte). If it was a stable or replaced myelin sheath, we  
701 determined whether the baseline myelin sheath had the same or different number of  
702 neighboring myelin sheaths. Myelin sheaths within the field that could not be definitively  
703 categorized were classified as “undefined”. Myelin paranodes were identified by increased  
704 EGFP fluorescence intensity (Hughes et al., 2018). Nodes of Ranvier were confirmed by plotting  
705 an intensity profile across the putative node; if the profile consisted of two local maxima  
706 separated by a minimum less than that of the internode, and the length of the gap between  
707 EGFP+ processes was  $< 5 \mu\text{m}$ , the structure was considered a node. For each field, myelin  
708 sheaths were traced by one investigator and independently assessed by a second investigator.

709

### 710 **Analysis of temporal and spatial dynamics of individual oligodendrocytes**

711 Registered longitudinal *in vivo* Z-stacks collected from *Mobp-EGFP* mice were acquired using  
712 two-photon microscopy every 1-3 days to follow the dynamics of newly formed mature

713 oligodendrocytes within cortical layer I at high resolution (200 - 400  $\mu\text{m}$  x-y, 100 - 120  $\mu\text{m}$  z,  
714 2048 x 2048 pixels). Using images from day of appearance, all processes originating from the  
715 cell body, branch points, and individual myelin sheaths were traced in FIJI using Simple Neurite  
716 Tracer (Longair et al., 2011). Traced segments were put through a smoothing function prior to  
717 length calculations to reduce artifacts of jagged traces. The fate of each process and myelin  
718 sheath (stable, lost) and changes in length (stable, growth, retraction) were determined for up to  
719 14 days per cell.

720

### 721 **Single oligodendrocyte territory analysis**

722 3-D coordinates of traces from all sheaths of a single oligodendrocyte were averaged to find the  
723 center of mass (to reduce artifactual territory volume that would be above the pia resulting from  
724 centering at the cell body). From this center, ellipsoid volumes were calculated from x-y and z  
725 radii, working backwards from the distance of the furthest sheath voxel in 1- $\mu\text{m}$  increments in  
726 each dimension. The ellipsoid dimensions for each traced cell was determined by the  
727 combination of x-y and z radii that produced the smallest volume containing  $\geq 80\%$  of the sheath  
728 voxels for that cell. Voxels within the ellipsoid were calculated by  $\frac{x_i}{r_x} + \frac{y_i}{r_y} + \frac{z_i}{r_z} \leq 1$  where  $(x_i, y_i, z_i)$   
729 is a voxel belonging to a sheath, and  $r_x$ ,  $r_y$ , and  $r_z$  are the radii being tested. Because all traced  
730 cell morphologies were not found to be significantly different from radial, the x and y radii were  
731 held equivalent. The average x-y and z radii across all traced baseline, control, or regenerated  
732 cells were used as standard dimensions for an oligodendrocyte “territory” in subsequent  
733 calculations.

734

735 Total territory volume for a single time-point (either baseline or 5 weeks recovery) was  
736 calculated in the following manner. In a 3-D matrix with dimensions, 425  $\mu\text{m}$  x 425  $\mu\text{m}$  x 33  $\mu\text{m}$   
737 corresponding to the number of voxels in the top zone of the imaged volume, all voxels  
738 contained within the territories of each cell were represented as 1's, and all voxels outside of  
739 cell territories were represented as 0's. Voxels within territories of more than one cell had values  
740 equal to the number of territories they were within. Total baseline volume “replaced” by  
741 regenerated territories was calculated as: ((5-week recovery matrix – baseline matrix)  $\leq 0$ ) +  
742 baseline matrix. The total proportion of baseline volume overlapped by regenerated territories  
743 was then calculated as: “replaced volume” / baseline volume. Because each imaged region had  
744 varying numbers of oligodendrocytes at baseline and regenerated oligodendrocytes in recovery,

745 final territory overlap proportions were scaled in the following manner: total overlap  $\times$  (number  
746 of cells @ baseline  $\div$  number of cells @ 5 weeks recovery).

747

### 748 **Analysis of nodal components**

749 Following immunostaining, images were acquired at 63x on a Zeiss 880 microscope at high  
750 resolution (135 x 135 x 40  $\mu\text{m}$ , 2048 x 2048 pixels). Images were processed in FIJI (background  
751 subtraction, rolling ball 60 pixels; 3-D median filter, 1.2 pixels XY 0.5 pixels Z). Images were  
752 acquired from sections immunostained for Caspr and  $\beta\text{IV}$ -spectrin, or both  $\beta\text{IV}$ -spectrin and  
753 Ankyrin-G. For images with both nodal components labeled, we found complete overlap of  
754 signal. In these cases, images were processed with “Image Calculator” in FIJI to reduce noise  
755 between channels, subtracting Ankyrin-G from  $\beta\text{IV}$ -spectrin signal. Images were imported into  
756 IMARIS and 3-D positions of all nodal signal and paranodal puncta (Caspr) were resolved with  
757 low- and high-pass filters and “Surface” and “Spot” functions. Axon initial segments were  
758 excluded using a size cutoff of  $\leq 6 \mu\text{m}$ . Custom MATLAB scripts were used to detect proximity  
759 (nearest neighbor Euclidian distance, threshold 3.5  $\mu\text{m}$  radius) of nodal puncta to Caspr puncta  
760 to determine proportions of nodes of Ranvier (2 Caspr puncta within 3.5  $\mu\text{m}$ ), heminodes (1  
761 Caspr punctum within 3.5  $\mu\text{m}$ ), or isolated (no nearby Caspr puncta). Coordinates from one  
762 channel were rotated 90 degrees in the x-y plane before running the proximity analysis again to  
763 confirm observed proportions were not due to chance.

764

### 765 **Statistical analysis**

766 No statistical tests were used to predetermine sample sizes, but our sample sizes are similar to  
767 those reported in previous publications (Hughes et al., 2018). Statistical analyses were  
768 performed with MATLAB (Mathworks) or Excel (Microsoft). Significance was typically  
769 determined using N-way ANOVA test with Bonferroni correction for multiple comparisons. Each  
770 figure legend otherwise contains the statistical tests used to measure significance and the  
771 corresponding significance level (p value). N represents the number of animals used in each  
772 experiment. Data are reported as mean  $\pm$  SEM and  $p < 0.05$  was considered statistically  
773 significant.

774

### 775 **Data availability**

776 All published code, tools, and reagents will be shared on an unrestricted basis; requests should  
777 be directed to the corresponding authors.

778

779 **REFERENCES**

- 780 Araújo, S. E. S., Mendonça, H. R., Wheeler, N. A., Campello-Costa, P., Jacobs, K. M., Gomes,  
781 F. C. A., ... Fuss, B. (2017). Inflammatory demyelination alters subcortical visual circuits.  
782 *Journal of Neuroinflammation*, 14(1), 162. <https://doi.org/10.1186/s12974-017-0936-0>
- 783 Auer, F., Vagionitis, S., & Czopka, T. (2018). Evidence for Myelin Sheath Remodeling in the  
784 CNS Revealed by In Vivo Imaging. *Current Biology : CB*, 28(4), 549-559.e3.  
785 <https://doi.org/10.1016/j.cub.2018.01.017>
- 786 Back, S. A., Tuohy, T. M. F., Chen, H., Wallingford, N., Craig, A., Struve, J., ... Sherman, L. S.  
787 (2005). Hyaluronan accumulates in demyelinated lesions and inhibits oligodendrocyte  
788 progenitor maturation. *Nature Medicine*, 11(9), 966–972. <https://doi.org/10.1038/nm1279>
- 789 Baxi, E. G., DeBruin, J., Jin, J., Strasburger, H. J., Smith, M. D., Orthmann-Murphy, J. L., ...  
790 Calabresi, P. A. (2017). Lineage tracing reveals dynamic changes in oligodendrocyte  
791 precursor cells following cuprizone-induced demyelination. *GLIA*, 65(12), 2087–2098.  
792 <https://doi.org/10.1002/glia.23229>
- 793 Baxi, E. G., DeBruin, J., Tosi, D. M., Grishkan, I. V., Smith, M. D., Kirby, L. A., ... Gocke, A. R.  
794 (2015). Transfer of Myelin-Reactive Th17 Cells Impairs Endogenous Remyelination in the  
795 Central Nervous System of Cuprizone-Fed Mice. *Journal of Neuroscience*, 35(22), 8626–  
796 8639. <https://doi.org/10.1523/JNEUROSCI.3817-14.2015>
- 797 Beck, E. S., Sati, P., Sethi, V., Kober, T., Dewey, B., Bhargava, P., ... Reich, D. S. (2018).  
798 Improved Visualization of Cortical Lesions in Multiple Sclerosis Using 7T MP2RAGE.  
799 *American Journal of Neuroradiology*, 39(3), 459–466. <https://doi.org/10.3174/ajnr.A5534>
- 800 Biteau, B., Hochmuth, C. E., & Jasper, H. (2011). Maintaining Tissue Homeostasis: Dynamic  
801 Control of Somatic Stem Cell Activity. *Cell Stem Cell*, 9(5), 402–411.  
802 <https://doi.org/10.1016/j.stem.2011.10.004>
- 803 Bock, D. D., Lee, W.-C. A., Kerlin, A. M., Andermann, M. L., Hood, G., Wetzell, A. W., ... Reid,  
804 R. C. (2011). Network anatomy and in vivo physiology of visual cortical neurons. *Nature*,  
805 471(7337), 177–182. <https://doi.org/10.1038/nature09802>
- 806 Calabrese, M., Poretto, V., Favaretto, A., Alessio, S., Bernardi, V., Romualdi, C., ... Gallo, P.  
807 (2012). Cortical lesion load associates with progression of disability in multiple sclerosis.  
808 *Brain*, 135(10), 2952–2961. <https://doi.org/10.1093/brain/aws246>
- 809 Chang, A., Nishiyama, A., Peterson, J., Prineas, J., & Trapp, B. D. (2000). NG2-positive  
810 oligodendrocyte progenitor cells in adult human brain and multiple sclerosis lesions. *The*  
811 *Journal of Neuroscience : The Official Journal of the Society for Neuroscience*, 20(17),  
812 6404–6412. <https://doi.org/10.1523/JNEUROSCI.20-17-06404.2000>

- 813 Chang, A., Staugaitis, S. M., Dutta, R., Batt, C. E., Easley, K. E., Chomyk, A. M., ... Trapp, B. D.  
814 (2012). Cortical remyelination: A new target for repair therapies in multiple sclerosis.  
815 *Annals of Neurology*, 72(6), 918–926. <https://doi.org/10.1002/ana.23693>
- 816 Chong, S. Y. C., Rosenberg, S. S., Fancy, S. P. J., Zhao, C., Shen, Y.-A. A., Hahn, A. T., ...  
817 Chan, J. R. (2012). Neurite outgrowth inhibitor Nogo-A establishes spatial segregation and  
818 extent of oligodendrocyte myelination. *Proceedings of the National Academy of Sciences of*  
819 *the United States of America*, 109(4), 1299–1304.  
820 <https://doi.org/10.1073/pnas.1113540109>
- 821 Coman, I., Aigrot, M. S., Seilhean, D., Reynolds, R., Girault, J. A., Zalc, B., & Lubetzki, C.  
822 (2006). Nodal, paranodal and juxtaparanodal axonal proteins during demyelination and  
823 remyelination in multiple sclerosis. *Brain : A Journal of Neurology*, 129(Pt 12), 3186–3195.  
824 <https://doi.org/10.1093/brain/awl144>
- 825 Craner, M. J., Newcombe, J., Black, J. A., Hartle, C., Cuzner, M. L., & Waxman, S. G. (2004).  
826 Molecular changes in neurons in multiple sclerosis: Altered axonal expression of Nav1.2  
827 and Nav1.6 sodium channels and Na<sup>+</sup>/Ca<sup>2+</sup> exchanger. *Proceedings of the National*  
828 *Academy of Sciences*, 101(21), 8168–8173. <https://doi.org/10.1073/pnas.0402765101>
- 829 Czopka, T., Ffrench-Constant, C., & Lyons, D. A. (2013). Individual oligodendrocytes have only  
830 a few hours in which to generate new myelin sheaths in vivo. *Developmental Cell*, 25(6),  
831 599–609. <https://doi.org/10.1016/j.devcel.2013.05.013>
- 832 Deshmukh, V. A., Tardif, V., Lyssiotis, C. A., Green, C. C., Kerman, B., Kim, H. J., ... Lairson, L.  
833 L. (2013). A regenerative approach to the treatment of multiple sclerosis. *Nature*,  
834 502(7471), 327–332. <https://doi.org/10.1038/nature12647>
- 835 Dimou, L., Simon, C., Kirchhoff, F., Takebayashi, H., & Götz, M. (2008). Progeny of Olig2-  
836 expressing progenitors in the gray and white matter of the adult mouse cerebral cortex.  
837 *The Journal of Neuroscience : The Official Journal of the Society for Neuroscience*, 28(41),  
838 10434–10442. <https://doi.org/10.1523/JNEUROSCI.2831-08.2008>
- 839 Dupree, J. L., Mason, J. L., Marcus, J. R., Stull, M., Levinson, R., Matsushima, G. K., & Popko,  
840 B. (2004). Oligodendrocytes assist in the maintenance of sodium channel clusters  
841 independent of the myelin sheath. *Neuron Glia Biology*, 1(3), 179–192.  
842 <https://doi.org/10.1017/S1740925X04000304>
- 843 Dutta, D. J., Woo, D. H., Lee, P. R., Pajevic, S., Bukalo, O., Huffman, W. C., ... Fields, R. D.  
844 (2018). Regulation of myelin structure and conduction velocity by perinodal astrocytes.  
845 *Proceedings of the National Academy of Sciences of the United States of America*,  
846 115(46), 11832–11837. <https://doi.org/10.1073/pnas.1811013115>

- 847 Early, J. J., Cole, K. L., Williamson, J. M., Swire, M., Kamadurai, H., Muskavitch, M., & Lyons,  
848 D. A. (2018). An automated high-resolution in vivo screen in zebrafish to identify chemical  
849 regulators of myelination. *ELife*, 7. <https://doi.org/10.7554/eLife.35136>
- 850 England, J. D., Gamboni, F., Levinson, S. R., & Finger, T. E. (1990). Changed distribution of  
851 sodium channels along demyelinated axons. *Proceedings of the National Academy of  
852 Sciences of the United States of America*, 87(17), 6777–6780. Retrieved from  
853 <http://www.ncbi.nlm.nih.gov/pubmed/2168559>
- 854 Filippi, M., Evangelou, N., Kangarlu, A., Inglese, M., Mainero, C., Horsfield, M. A., & Rocca, M.  
855 A. (2014). Ultra-high-field MR imaging in multiple sclerosis. *Journal of Neurology,  
856 Neurosurgery, and Psychiatry*, 85(1), 60–66. <https://doi.org/10.1136/jnnp-2013-305246>
- 857 Gibson, E. M., Purger, D., Mount, C. W., Goldstein, A. K., Lin, G. L., Wood, L. S., ... Monje, M.  
858 (2014). Neuronal activity promotes oligodendrogenesis and adaptive myelination in the  
859 mammalian brain. *Science (New York, N. Y.)*, 344(6183).  
860 <https://doi.org/10.1126/science.1252304>
- 861 Gouw, A. A., Seewann, A., Vrenken, H., van der Flier, W. M., Rozemuller, J. M., Barkhof, F., ...  
862 Geurts, J. J. G. (2008). Heterogeneity of white matter hyperintensities in Alzheimer's  
863 disease: post-mortem quantitative MRI and neuropathology. *Brain*, 131(12), 3286–3298.  
864 <https://doi.org/10.1093/brain/awn265>
- 865 Gudi, V., Moharregh-Khiabani, D., Skripuletz, T., Koutsoudaki, P. N., Kotsiari, A., Skuljec, J., ...  
866 Stangel, M. (2009). Regional differences between grey and white matter in cuprizone  
867 induced demyelination. *Brain Research*, 1283, 127–138.  
868 <https://doi.org/10.1016/j.brainres.2009.06.005>
- 869 Herranz, E., Louapre, C., Treaba, C. A., Govindarajan, S. T., Ouellette, R., Mangeat, G., ...  
870 Mainero, C. (2019). Profiles of cortical inflammation in multiple sclerosis by 11C-PBR28  
871 MR-PET and 7 Tesla imaging. *Multiple Sclerosis (Houndmills, Basingstoke, England)*,  
872 1352458519867320. <https://doi.org/10.1177/1352458519867320>
- 873 Hill, R. A., Li, A. M., & Grutzendler, J. (2018). Lifelong cortical myelin plasticity and age-related  
874 degeneration in the live mammalian brain. *Nature Neuroscience*, 21(5), 683–695.  
875 <https://doi.org/10.1038/s41593-018-0120-6>
- 876 Holtmaat, A., de Paola, V., Wilbrecht, L., Trachtenberg, J. T., Svoboda, K., & Portera-Cailliau,  
877 C. (2012). Imaging neocortical neurons through a chronic cranial window. *Cold Spring  
878 Harbor Protocols*, 2012(6), 694–701. <https://doi.org/10.1101/pdb.prot069617>
- 879 Howell, O. W., Reeves, C. A., Nicholas, R., Carassiti, D., Radotra, B., Gentleman, S. M., ...  
880 Reynolds, R. (2011). Meningeal inflammation is widespread and linked to cortical



- 881 pathology in multiple sclerosis. *Brain*, 134(9), 2755–2771.  
882 <https://doi.org/10.1093/brain/awr182>
- 883 Hughes, E. G., Kang, S. H., Fukaya, M., & Bergles, D. E. (2013). Oligodendrocyte progenitors  
884 balance growth with self-repulsion to achieve homeostasis in the adult brain. *Nature*  
885 *Neuroscience*, 16(6), 668–676. <https://doi.org/10.1038/nn.3390>
- 886 Hughes, E. G., Orthmann-Murphy, J. L., Langseth, A. J., & Bergles, D. E. (2018). Myelin  
887 remodeling through experience-dependent oligodendrogenesis in the adult somatosensory  
888 cortex. *Nature Neuroscience*, 21(5), 696–706. <https://doi.org/10.1038/s41593-018-0121-5>
- 889 Ihara, M., Polvikoski, T. M., Hall, R., Slade, J. Y., Perry, R. H., Oakley, A. E., ... Kalaria, R. N.  
890 (2010). Quantification of myelin loss in frontal lobe white matter in vascular dementia,  
891 Alzheimer's disease, and dementia with Lewy bodies. *Acta Neuropathologica*, 119(5), 579–  
892 589. <https://doi.org/10.1007/s00401-009-0635-8>
- 893 Jeffery, N. D., & Blakemore, W. F. (1995). Remyelination of mouse spinal cord axons  
894 demyelinated by local injection of lysolecithin. *Journal of Neurocytology*, 24(10), 775–781.  
895 <https://doi.org/10.1007/bf01191213>
- 896 Kang, S. H., Fukaya, M., Yang, J. K., Rothstein, J. D., & Bergles, D. E. (2010). NG2+ CNS glial  
897 progenitors remain committed to the oligodendrocyte lineage in postnatal life and following  
898 neurodegeneration. *Neuron*, 68(4), 668–681.
- 899 Kidd, D., Barkhof, F., McConnell, R., Algra, P. R., Allen, I. V., & Revesz, T. (1999). Cortical  
900 lesions in multiple sclerosis. *Brain: A Journal of Neurology*, 122 ( Pt 1), 17–26.  
901 <https://doi.org/10.1093/brain/122.1.17>
- 902 Kilsdonk, I. D., de Graaf, W. L., Soriano, A. L., Zwanenburg, J. J., Visser, F., Kuijjer, J. P. A., ...  
903 Wattjes, M. P. (2013). Multicontrast MR imaging at 7T in multiple sclerosis: highest lesion  
904 detection in cortical gray matter with 3D-FLAIR. *AJNR. American Journal of*  
905 *Neuroradiology*, 34(4), 791–796. <https://doi.org/10.3174/ajnr.A3289>
- 906 Kirby, L., Jin, J., Cardona, J. G., Smith, M. D., Martin, K. A., Wang, J., ... Calabresi, P. A.  
907 (2019). Oligodendrocyte precursor cells present antigen and are cytotoxic targets in  
908 inflammatory demyelination. *Nature Communications*, 10(1), 3887.  
909 <https://doi.org/10.1038/s41467-019-11638-3>
- 910 Klingseisen, A., Ristoiu, A.-M., Kegel, L., Sherman, D. L., Rubio-Brotons, M., Almeida, R. G., ...  
911 Lyons, D. A. (2019). Oligodendrocyte Neurofascin Independently Regulates Both Myelin  
912 Targeting and Sheath Growth in the CNS. *Developmental Cell*, 51(6), 730-744.e6.  
913 <https://doi.org/10.1016/j.devcel.2019.10.016>
- 914 Kotter, M. R., Li, W.-W., Zhao, C., & Franklin, R. J. M. (2006). Myelin Impairs CNS

- 915 Remyelination by Inhibiting Oligodendrocyte Precursor Cell Differentiation. *Journal of*  
916 *Neuroscience*, 26(1), 328–332. <https://doi.org/10.1523/JNEUROSCI.2615-05.2006>
- 917 Kutzelnigg, A. (2005). Cortical demyelination and diffuse white matter injury in multiple sclerosis.  
918 *Brain*, 128(11), 2705–2712. <https://doi.org/10.1093/brain/awh641>
- 919 Lassmann, H., Brück, W., Lucchinetti, C., & Rodriguez, M. (1997). Remyelination in multiple  
920 sclerosis. *Multiple Sclerosis Journal*, 3(2), 133–136.  
921 <https://doi.org/10.1177/135245859700300213>
- 922 Lau, L. W., Keough, M. B., Haylock-Jacobs, S., Cua, R., Döring, A., Sloka, S., ... Yong, V. W.  
923 (2012). Chondroitin sulfate proteoglycans in demyelinated lesions impair remyelination.  
924 *Annals of Neurology*, 72(3), 419–432. <https://doi.org/10.1002/ana.23599>
- 925 Lodato, S., & Arlotta, P. (2015). Generating neuronal diversity in the mammalian cerebral  
926 cortex. *Annual Review of Cell and Developmental Biology*, 31, 699–720.  
927 <https://doi.org/10.1146/annurev-cellbio-100814-125353>
- 928 Longair, M. H., Baker, D. A., & Armstrong, J. D. (2011). Simple Neurite Tracer: open source  
929 software for reconstruction, visualization and analysis of neuronal processes.  
930 *Bioinformatics (Oxford, England)*, 27(17), 2453–2454.  
931 <https://doi.org/10.1093/bioinformatics/btr390>
- 932 Lucchinetti, C. F., Popescu, B. F. G., Bunyan, R. F., Moll, N. M., Roemer, S. F., Lassmann, H.,  
933 ... Ransohoff, R. M. (2011). Inflammatory cortical demyelination in early multiple sclerosis.  
934 *The New England Journal of Medicine*, 365(23), 2188–2197.  
935 <https://doi.org/10.1056/NEJMoa1100648>
- 936 Magliozzi, R., Reynolds, R., & Calabrese, M. (2018). MRI of cortical lesions and its use in  
937 studying their role in MS pathogenesis and disease course. *Brain Pathology*, 28(5), 735–  
938 742. <https://doi.org/10.1111/bpa.12642>
- 939 Magliozzi, Roberta, Howell, O., Vora, A., Serafini, B., Nicholas, R., Puopolo, M., ... Aloisi, F.  
940 (2007). Meningeal B-cell follicles in secondary progressive multiple sclerosis associate with  
941 early onset of disease and severe cortical pathology. *Brain : A Journal of Neurology*, 130(Pt  
942 4), 1089–1104. <https://doi.org/10.1093/brain/awm038>
- 943 Matsushima, G. K., & Morell, P. (2001). The neurotoxicant, cuprizone, as a model to study  
944 demyelination and remyelination in the central nervous system. *Brain Pathology (Zurich,*  
945 *Switzerland)*, 11(1), 107–116. <https://doi.org/10.1111/j.1750-3639.2001.tb00385.x>
- 946 McKenzie, I. A., Ohayon, D., Li, H., de Faria, J. P., Emery, B., Tohyama, K., & Richardson, W.  
947 D. (2014). Motor skill learning requires active central myelination. *Science (New York,*  
948 *N.Y.)*, 346(6207), 318–322. <https://doi.org/10.1126/science.1254960>

- 949 Mei, F., Fancy, S. P. J., Shen, Y.-A. A., Niu, J., Zhao, C., Presley, B., ... Chan, J. R. (2014).  
950 Micropillar arrays as a high-throughput screening platform for therapeutics in multiple  
951 sclerosis. *Nature Medicine*, 20(8), 954–960. <https://doi.org/10.1038/nm.3618>
- 952 Mi, S., Miller, R. H., Lee, X., Scott, M. L., Shulag-Morskaya, S., Shao, Z., ... Pepinsky, R. B.  
953 (2005). LINGO-1 negatively regulates myelination by oligodendrocytes. *Nature*  
954 *Neuroscience*, 8(6), 745–751. <https://doi.org/10.1038/nn1460>
- 955 Micheva, K. D., Wolman, D., Mensh, B. D., Pax, E., Buchanan, J., Smith, S. J., & Bock, D. D.  
956 (2016). A large fraction of neocortical myelin ensheathes axons of local inhibitory neurons.  
957 *ELife*, 5. <https://doi.org/10.7554/eLife.15784>
- 958 Miron, V. E., Boyd, A., Zhao, J.-W., Yuen, T. J., Ruckh, J. M., Shadrach, J. L., ... Ffrench-  
959 Constant, C. (2013). M2 microglia and macrophages drive oligodendrocyte differentiation  
960 during CNS remyelination. *Nature Neuroscience*, 16(9), 1211–1218.  
961 <https://doi.org/10.1038/nn.3469>
- 962 Murtie, J. C., Macklin, W. B., & Corfas, G. (2007). Morphometric analysis of oligodendrocytes in  
963 the adult mouse frontal cortex. *Journal of Neuroscience Research*, 85(10), 2080–2086.  
964 <https://doi.org/10.1002/jnr.21339>
- 965 Neumann, B., Baror, R., Zhao, C., Segel, M., Dietmann, S., Rawji, K. S., ... Franklin, R. J. M.  
966 (2019). Metformin Restores CNS Remyelination Capacity by Rejuvenating Aged Stem  
967 Cells. *Cell Stem Cell*, 25(4), 473-485.e8. <https://doi.org/10.1016/j.stem.2019.08.015>
- 968 Nicaise, A. M., Wagstaff, L. J., Willis, C. M., Paisie, C., Chandok, H., Robson, P., ... Crocker, S.  
969 J. (2019). Cellular senescence in progenitor cells contributes to diminished remyelination  
970 potential in progressive multiple sclerosis. *Proceedings of the National Academy of*  
971 *Sciences*, 116(18), 9030–9039. <https://doi.org/10.1073/pnas.1818348116>
- 972 Nielsen, A. S., Kinkel, R. P., Madigan, N., Tinelli, E., Benner, T., & Mainero, C. (2013).  
973 Contribution of cortical lesion subtypes at 7T MRI to physical and cognitive performance in  
974 MS. *Neurology*, 81(7), 641–649. <https://doi.org/10.1212/WNL.0b013e3182a08ce8>
- 975 Oh, J., Ontaneda, D., Azevedo, C., Klawiter, E. C., Absinta, M., Arnold, D. L., ... North American  
976 Imaging in Multiple Sclerosis Cooperative. (2019). Imaging outcome measures of  
977 neuroprotection and repair in MS. *Neurology*, 92(11), 10.1212/WNL.0000000000007099.  
978 <https://doi.org/10.1212/WNL.0000000000007099>
- 979 Parslow, A., Cardona, A., & Bryson-Richardson, R. J. (2014). Sample drift correction following  
980 4D confocal time-lapse imaging. *Journal of Visualized Experiments : JoVE*, (86).  
981 <https://doi.org/10.3791/51086>
- 982 Peterson, J. W., Bö, L., Mörk, S., Chang, A., & Trapp, B. D. (2001). Transected neurites,

- 983 apoptotic neurons, and reduced inflammation in cortical multiple sclerosis lesions. *Annals*  
984 *of Neurology*, 50(3), 389–400. Retrieved from  
985 <http://www.ncbi.nlm.nih.gov/pubmed/11558796>
- 986 Rankin, K. A., Mei, F., Kim, K., Shen, Y.-A. A., Mayoral, S. R., Despons, C., ... Bove, R. (2019).  
987 Selective Estrogen Receptor Modulators Enhance CNS Remyelination Independent of  
988 Estrogen Receptors. *The Journal of Neuroscience: The Official Journal of the Society for*  
989 *Neuroscience*, 39(12), 2184–2194. <https://doi.org/10.1523/JNEUROSCI.1530-18.2019>
- 990 Ruckh, J. M., Zhao, J.-W., Shadrach, J. L., van Wijngaarden, P., Rao, T. N., Wagers, A. J., &  
991 Franklin, R. J. M. (2012). Rejuvenation of regeneration in the aging central nervous  
992 system. *Cell Stem Cell*, 10(1), 96–103. <https://doi.org/10.1016/j.stem.2011.11.019>
- 993 Samanta, J., Grund, E. M., Silva, H. M., Lafaille, J. J., Fishell, G., & Salzer, J. L. (2015).  
994 Inhibition of Gli1 mobilizes endogenous neural stem cells for remyelination. *Nature*,  
995 526(7573), 448–452. <https://doi.org/10.1038/nature14957>
- 996 Skripuletz, T., Lindner, M., Kotsiari, A., Garde, N., Fokuhl, J., Linsmeier, F., ... Stangel, M.  
997 (2008). Cortical demyelination is prominent in the murine cuprizone model and is strain-  
998 dependent. *The American Journal of Pathology*, 172(4), 1053–1061.  
999 <https://doi.org/10.2353/ajpath.2008.070850>
- 1000 Stedehouder, J., Couey, J. J., Brizee, D., Hosseini, B., Slotman, J. A., Dirven, C. M. F., ...  
1001 Kushner, S. A. (2017). Fast-spiking Parvalbumin Interneurons are Frequently Myelinated in  
1002 the Cerebral Cortex of Mice and Humans. *Cerebral Cortex (New York, N.Y. : 1991)*, 27(10),  
1003 5001–5013. <https://doi.org/10.1093/cercor/bhx203>
- 1004 Stedehouder, J., & Kushner, S. A. (2017). Myelination of parvalbumin interneurons: a  
1005 parsimonious locus of pathophysiological convergence in schizophrenia. *Molecular*  
1006 *Psychiatry*, 22(1), 4–12. <https://doi.org/10.1038/mp.2016.147>
- 1007 Su, Z., Yuan, Y., Chen, J., Zhu, Y., Qiu, Y., Zhu, F., ... He, C. (2011). Reactive astrocytes inhibit  
1008 the survival and differentiation of oligodendrocyte precursor cells by secreted TNF- $\alpha$ .  
1009 *Journal of Neurotrauma*, 28(6), 1089–1100. <https://doi.org/10.1089/neu.2010.1597>
- 1010 Susuki, K., Otani, Y., & Rasband, M. N. (2016). Submembranous cytoskeletons stabilize nodes  
1011 of Ranvier. *Experimental Neurology*, 283, 446–451.  
1012 <https://doi.org/10.1016/J.EXPNEUROL.2015.11.012>
- 1013 Tomassy, G. S., Berger, D. R., Chen, H.-H., Kasthuri, N., Hayworth, K. J., Vercelli, A., ...  
1014 Arlotta, P. (2014). Distinct Profiles of Myelin Distribution Along Single Axons of Pyramidal  
1015 Neurons in the Neocortex. *Science*, 344(6181), 319–324.  
1016 <https://doi.org/10.1126/science.1249766>

- 1017 Trapp, B. D., Nishiyama, A., Cheng, D., & Macklin, W. (1997). Differentiation and death of  
1018 premyelinating oligodendrocytes in developing rodent brain. *The Journal of Cell Biology*,  
1019 137(2), 459–468. <https://doi.org/10.1083/jcb.137.2.459>
- 1020 Vega-Riquer, J. M., Mendez-Victoriano, G., Morales-Luckie, R. A., & Gonzalez-Perez, O.  
1021 (2019). Five Decades of Cuprizone, an Updated Model to Replicate Demyelinating  
1022 Diseases. *Current Neuropharmacology*, 17(2), 129–141.  
1023 <https://doi.org/10.2174/1570159X15666170717120343>
- 1024 Walhovd, K. B., Johansen-Berg, H., & Káradóttir, R. T. (2014). Unraveling the secrets of white  
1025 matter--bridging the gap between cellular, animal and human imaging studies.  
1026 *Neuroscience*, 276(100), 2–13. <https://doi.org/10.1016/j.neuroscience.2014.06.058>
- 1027 Werneburg, S., Jung, J., Kunjamma, R. B., Ha, S.-K., Luciano, N. J., Willis, C. M., ... Schafer,  
1028 D. P. (2020). Targeted Complement Inhibition at Synapses Prevents Microglial Synaptic  
1029 Engulfment and Synapse Loss in Demyelinating Disease. *Immunity*, 52(1), 167-182.e7.  
1030 <https://doi.org/10.1016/j.immuni.2019.12.004>
- 1031 Xiao, L., Ohayon, D., McKenzie, I. A., Sinclair-Wilson, A., Wright, J. L., Fudge, A. D., ...  
1032 Richardson, W. D. (2016). Rapid production of new oligodendrocytes is required in the  
1033 earliest stages of motor-skill learning. *Nature Neuroscience*, 19(9), 1210–1217.  
1034 <https://doi.org/10.1038/nn.4351>
- 1035 Yeung, M. S. Y., Djelloul, M., Steiner, E., Bernard, S., Salehpour, M., Possnert, G., ... Frisé, J.  
1036 (2019). Dynamics of oligodendrocyte generation in multiple sclerosis. *Nature*, 566(7745),  
1037 538–542. <https://doi.org/10.1038/s41586-018-0842-3>
- 1038 Yeung, M. S. Y., Zdunek, S., Bergmann, O., Bernard, S., Salehpour, M., Alkass, K., ... Frisé, J.  
1039 (2014). Dynamics of oligodendrocyte generation and myelination in the human brain. *Cell*,  
1040 159(4), 766–774. <https://doi.org/10.1016/j.cell.2014.10.011>
- 1041 Young, K. M., Psachoulia, K., Tripathi, R. B., Dunn, S.-J., Cossell, L., Attwell, D., ... Richardson,  
1042 W. D. (2013). Oligodendrocyte dynamics in the healthy adult CNS: evidence for myelin  
1043 remodeling. *Neuron*, 77(5), 873–885. <https://doi.org/10.1016/j.neuron.2013.01.006>
- 1044 Zhang, Y., Zhang, J., Navrazhina, K., Argaw, A. T., Zameer, A., Gurfein, B. T., ... John, G. R.  
1045 (2010). TGFbeta1 induces Jagged1 expression in astrocytes via ALK5 and Smad3 and  
1046 regulates the balance between oligodendrocyte progenitor proliferation and differentiation.  
1047 *Glia*, 58(8), 964–974. <https://doi.org/10.1002/glia.20978>
- 1048
- 1049
- 1050

1051 **ACKNOWLEDGEMENTS**

1052 We thank Dr. M Pucak and N Ye for technical assistance, T Shelly for machining expertise, M  
1053 Bhat for gift of the anti-Caspr antibody and members of the Bergles laboratory for discussions. J  
1054 Orthmann-Murphy was supported by grants from the National Multiple Sclerosis Society and the  
1055 Hilton Foundation. C Call and G Molina-Castro were supported by National Science Foundation  
1056 Graduate Research Fellowships. Funding was provided by grants from the NIH (NS051509,  
1057 NS050274, NS080153), a Collaborative Research Center Grant from the National Multiple  
1058 Sclerosis Society, and the Dr. Miriam and Sheldon G Adelson Medical Research Foundation to  
1059 D Bergles.

1060

1061

1062 **Competing interests:**

1063 JOM, CLC, GCM, YCH, MNR and DEB have no competing interests. PAC is PI on grants to  
1064 JHU from Biogen and Annexon and has received consulting fees for serving on scientific  
1065 advisory boards for Biogen and Disarm Therapeutics.

1066



1067 **FIGURES AND LEGENDS**

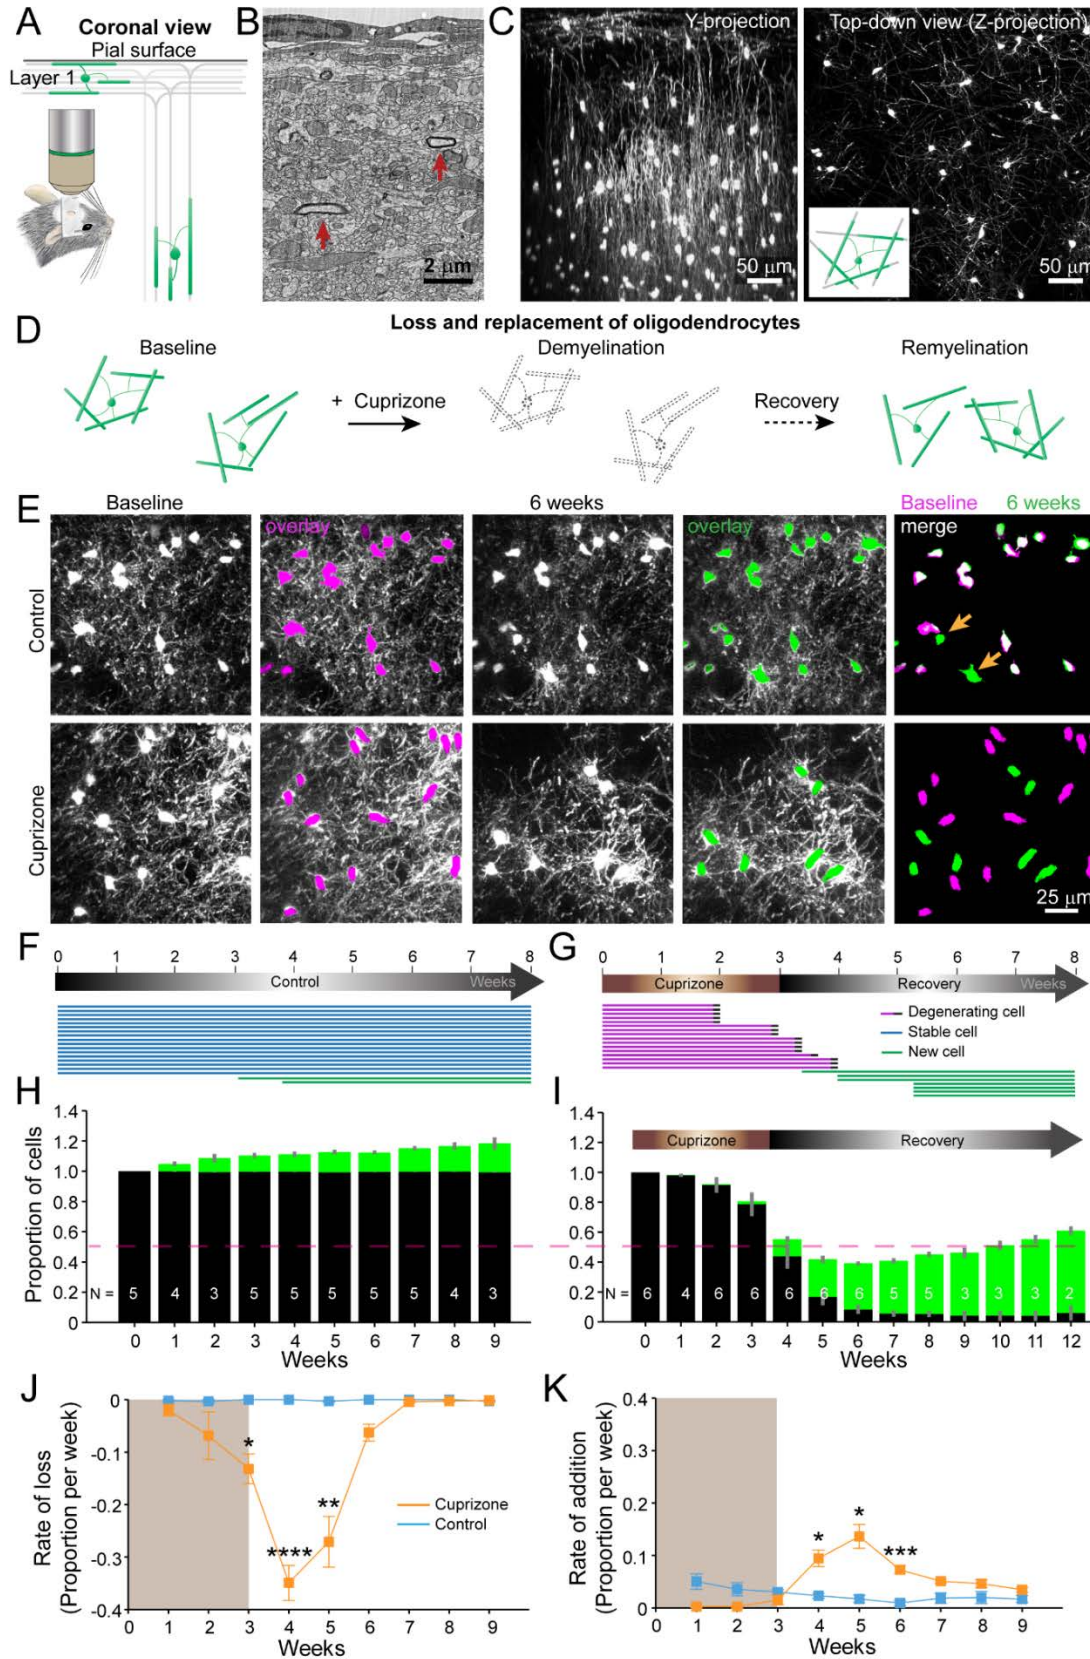

1068

1069 **Figure 1: An *in vivo* platform to monitor loss and replacement of oligodendrocytes in the**  
1070 **upper cortical layers.** A: *In vivo* two photon microscopy through chronic cranial windows over  
1071 the somatosensory cortex of *Mobp-EGFP* mice (coronal view), showing myelinated fibers in  
1072 cortical layer I parallel to pial surface and in deeper layers oriented perpendicularly. B: Electron  
1073 micrograph reconstruction of adult mouse visual cortex (from (Bock et al., 2011) illustrating low  
1074 density of myelinated fibers (arrows) in the upper layers of cortex. C: Maximum intensity  $y$ -  
1075 projection (coronal view, 425  $\mu\text{m}$  x 150  $\mu\text{m}$  x 550  $\mu\text{m}$ ) and  $z$ -projection (top-down view, 425  $\mu\text{m}$   
1076 x 425  $\mu\text{m}$  x 100  $\mu\text{m}$ ) example regions from *Mobp-EGFP* mice with chronic cranial windows. D:  
1077 Schematic illustrating longitudinal course of loss (demyelination) and replacement  
1078 (remyelination) of cortical oligodendrocytes. E: Examples of maximum intensity projection  
1079 images of the same region (156  $\mu\text{m}$  x 156  $\mu\text{m}$  x 84  $\mu\text{m}$ ) imaged repeatedly from an adult sham-  
1080 (control, top row) or a cuprizone-treated (bottom row) mouse are shown with overlay of cell  
1081 bodies from baseline (magenta) and after 6 weeks (green). Merge of baseline and 6 week  
1082 overlays show where new cells are added to the region (arrows). F-G: Individual cells  
1083 (represented by magenta, blue or green lines) were tracked longitudinally in somatosensory  
1084 cortex from mice fed control (F; from region in top row of E) or cuprizone diet (G; from region in  
1085 bottom row of E). H-K: The same cortical volume (425  $\mu\text{m}$  x 425  $\mu\text{m}$  x 300  $\mu\text{m}$ ) was imaged  
1086 repeatedly in mice given either control or cuprizone diet, and individual cells present at baseline  
1087 (black) or formed at later time points (green) were tracked over time. Shown are the average  
1088 cell counts depicted as a proportion of baseline number of cells, (H, N = 5 control mice; I, N = 6  
1089 cuprizone mice, I; number of mice imaged at each time point indicated). J-K: The average rate  
1090 of loss (J) or addition (K) of oligodendrocytes per week in control-treated (blue) v. cuprizone-  
1091 treated mice (orange) relative to the baseline population of oligodendrocytes. Treatment with  
1092 sham or cuprizone-supplemented chow denoted by shaded background. In cuprizone-treated  
1093 mice, there was a higher rate of oligodendrocyte loss over weeks 3-5 (@ 3 weeks,  $p = 0.02014$ ;  
1094 @ 4 weeks,  $p=0.0000488$ ; @ 5 weeks,  $p = 0.0066$ ) and addition of new cells between 4-6  
1095 weeks (@ 4 weeks,  $p = 0.0280$ ; @ 5 weeks,  $p = 0.0121$ ; @ 6 weeks,  $p = 0.000530$ ) compared  
1096 to control. Data is presented as means with standard error of the mean bars; data are compared  
1097 with N-way ANOVA test with Bonferroni correction for multiple comparisons.  
1098

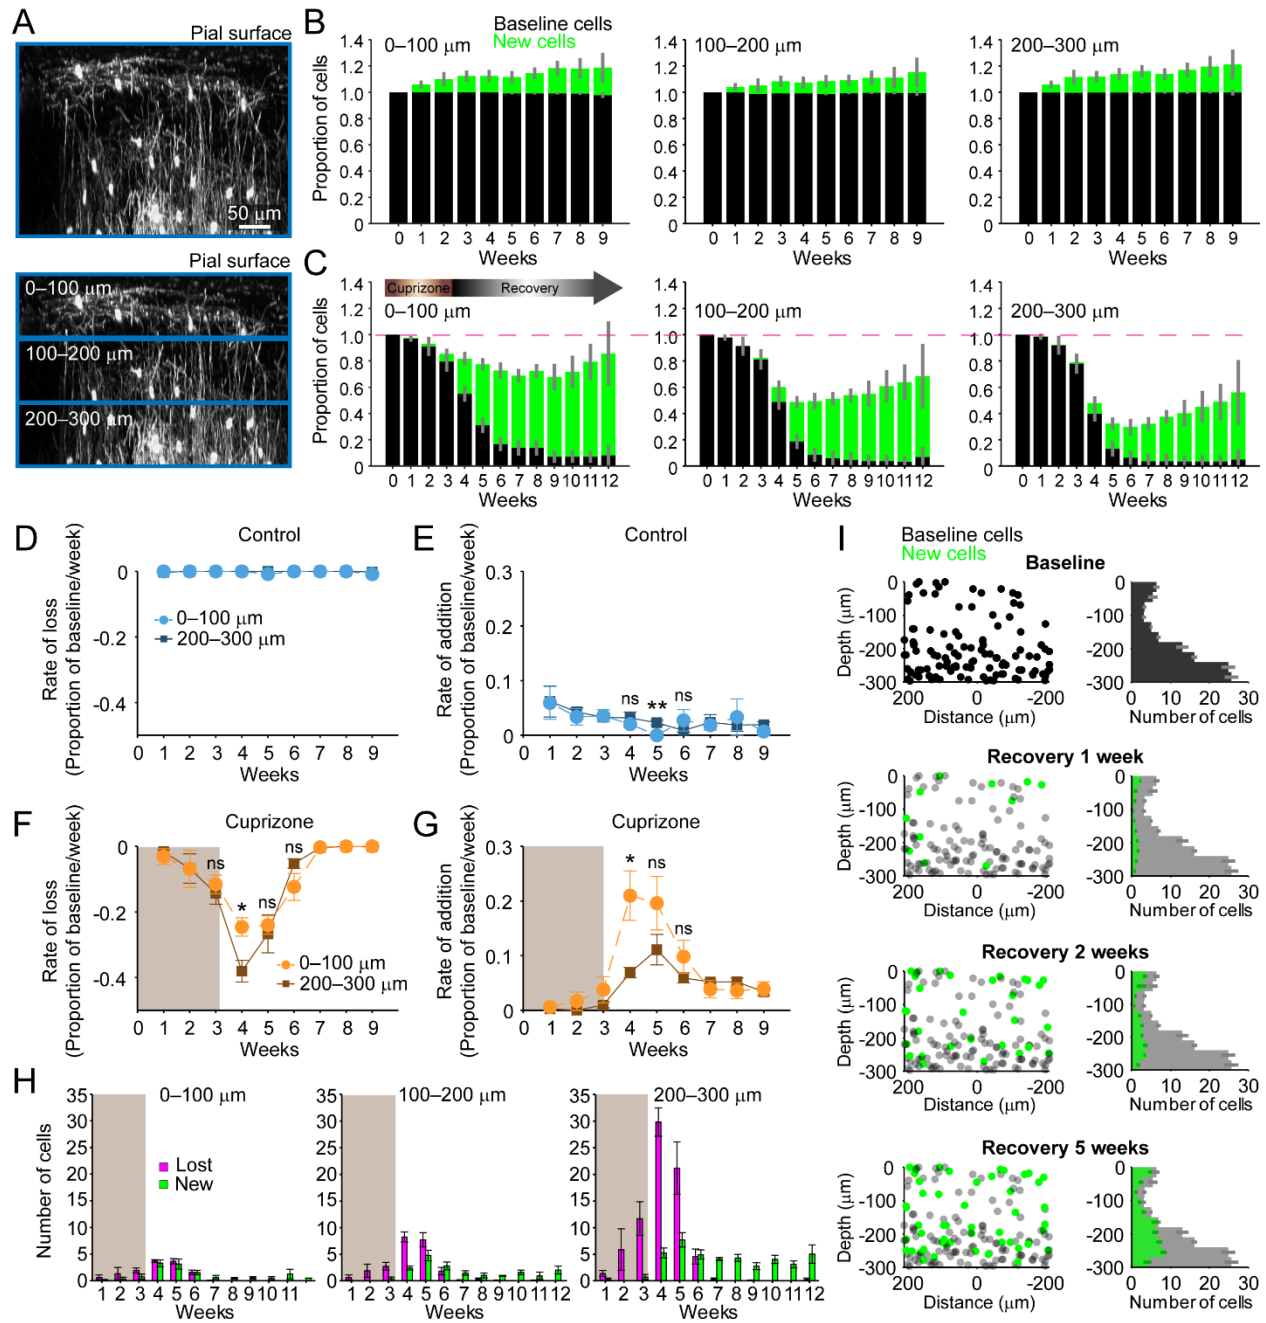

1099

1100 **Figure 2: Regeneration of oligodendrocytes is incomplete in lower cortical regions. A:**

1101 The fate of individual oligodendrocytes were determined within the same cortical volume (425

1102 μm x 425 μm x 300 μm) over time that was divided into 0-100, 100-200, or 200-300 μm zones,

1103 (example maximum intensity Y projection is 425 μm x 150 μm x 300 μm). B-C: Mice were given

1104 either control diet (B) or cuprizone-supplemented diet (C), and individual cells present at

1105 baseline (black) or newly appearing over the time-course (green) were tracked longitudinally.

1106 The average cell counts per volume are depicted as a proportion of baseline number of cells (B:

1107 N = 5 control mice; C: N = 6 cuprizone-treated mice; with the same number of mice imaged at  
1108 each time point as depicted in Fig. 1H,I). D-G: The rate of cell loss (D, F) or addition (E,G)  
1109 relative to the baseline population of oligodendrocytes in each zone are depicted for each  
1110 imaging time-point as a function of cortical depth (0-100 v. 200-300  $\mu\text{m}$  zones), over 9 weeks of  
1111 imaging in control (D-E) or cuprizone-treated (F-G) mice. Treatment with cuprizone-  
1112 supplemented chow denoted by shaded background (F-G). Cells are rarely lost in control  
1113 regions (D), and the rate of cell addition in the 0-100 (light blue circles) v. 200-300  $\mu\text{m}$  (dark blue  
1114 squares) zones are similar (except @ week 5,  $p = 0.0036$ ). In the bottom 200-300  $\mu\text{m}$  zone (F-  
1115 G, in cuprizone-treated mice (brown squares), the rate of oligodendrocyte loss (F) is significantly  
1116 greater at week 4 relative to the top (0-100  $\mu\text{m}$ , orange circles) zone ( $p = 0.0443$ ), and the rate  
1117 of addition is significantly lower (G;  $p = 0.0364$ ). H: The mean number of oligodendrocytes lost  
1118 (magenta) and added (green) at each imaging time-point, comparing the 0-100  $\mu\text{m}$  and 200-300  
1119  $\mu\text{m}$  zones. I: The distribution of baseline (gray) and new (green) oligodendrocyte cell bodies  
1120 relative to the center of an example region volume (left-side panels; 425  $\mu\text{m}$  x 425  $\mu\text{m}$  x 300  
1121  $\mu\text{m}$ ) and for all regions quantified (right-side panels; mean values from N = 6 mice) relative to  
1122 the pial surface (0 on y-axis) is shown at baseline and at recovery weeks 1, 2 and 5  
1123 (corresponding to week 4, 5, and 8 of imaging weeks from A-H). Mean values depicted with  
1124 error bars as standard error of the mean, and statistical tests are N-way ANOVA with Bonferroni  
1125 correction for multiple comparisons.



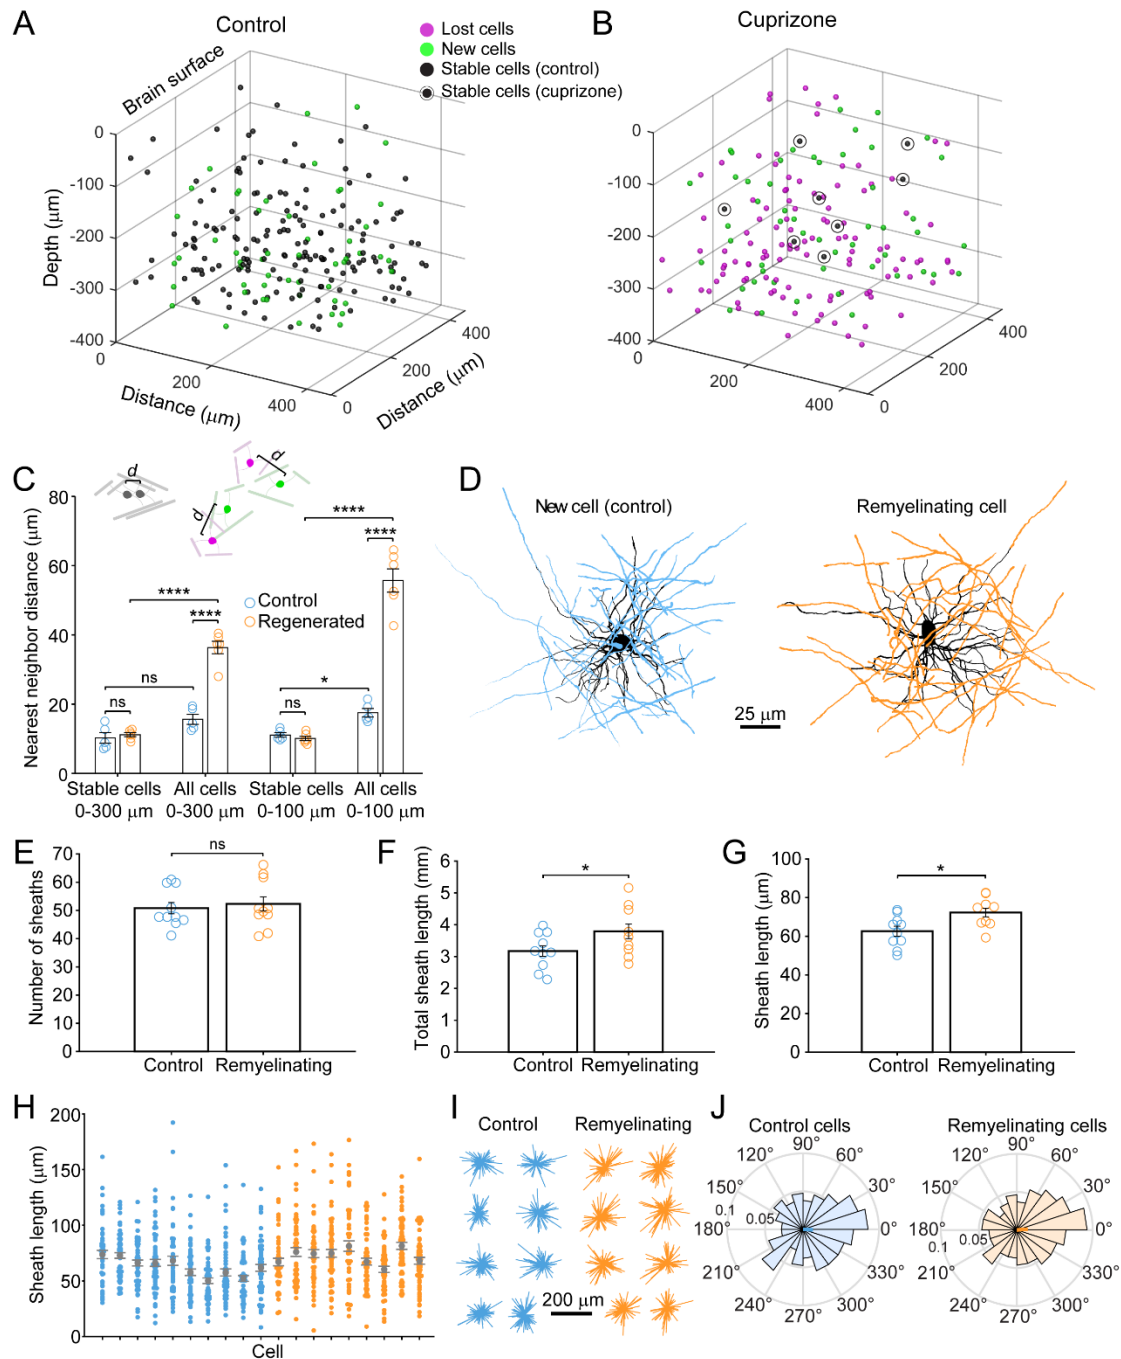

1126

1127

**Figure 3: Remyelinating oligodendrocytes appear in novel locations but maintain morphology of oligodendrocytes generated in cuprizone-naïve mice.**

1128

1129

A-B: The location for all oligodendrocyte cell bodies present within the same cortical volume

1130

(425  $\mu\text{m}$  x 425  $\mu\text{m}$  x 300  $\mu\text{m}$ ) at baseline and after 8 weeks of two photon *in vivo* imaging are

1131

plotted and overlaid in 3-D. The fate of each cell over this time-course is designated as stable

1132

(black), lost (magenta), new (green). Example volumes for control (A) and cuprizone-treated (B)

1133

cortex are shown. C: The average 3-D nearest neighbor distance (NND) for lost, new, and

1134 stable cells, comparing baseline and last (8 weeks) imaging time-point locations, as plotted in A-  
1135 B, were determined. Stable cells in both control (blue) v. cuprizone-treated (orange) cortices are  
1136 minimally displaced (schematized by two gray oligodendrocytes displaced by  $d$  distance) in both  
1137 the full  $425 \mu\text{m} \times 425 \mu\text{m} \times 300 \mu\text{m}$  ( $0\text{-}300 \mu\text{m}$ ;  $p = 4.64$ ) volumes and the surface  $425 \mu\text{m} \times 425$   
1138  $\mu\text{m} \times 100 \mu\text{m}$  ( $0\text{-}100 \mu\text{m}$ ,  $p = 2.36$ ) volume. New cells added into control cortex did not  
1139 significantly alter NND in the full  $0\text{-}300 \mu\text{m}$  region (controls cells (blue), all cells  $0\text{-}300 \mu\text{m}$  v.  
1140 stable cells  $0\text{-}300 \mu\text{m}$ ,  $p = 0.284$ ), but did so in the top  $0\text{-}100 \mu\text{m}$  zone, (controls cells (blue), all  
1141 cells  $0\text{-}100 \mu\text{m}$  v. stable cells  $0\text{-}100 \mu\text{m}$ ,  $p = 0.0137$ ). The displacement of oligodendrocytes in  
1142 cuprizone-treated cortex (schematized displacement ( $d$ ) between lost (magenta) and new  
1143 (green) cells) was greater in cuprizone-treated cortex (regenerated cells (orange), all cells  $0\text{-}300$   
1144  $\mu\text{m}$  v. stable cells  $0\text{-}300 \mu\text{m}$ ;  $p = 8.95 \times 10^{-7}$ ), despite near complete replacement of cells in the  
1145 top  $0\text{-}100 \mu\text{m}$  zone (regenerated cells (orange), all cells  $0\text{-}100 \mu\text{m}$  v. stable cells  $0\text{-}100 \mu\text{m}$ ;  $p =$   
1146  $9.12 \times 10^{-7}$ ). All comparisons in C are N-way ANOVA with Bonferroni correction for multiple  
1147 comparisons. D: Every cell body (black), process (black) and myelin sheath (blue, control (10  
1148 cells,  $N=3$  mice); orange, cuprizone (9 cells,  $N=3$  mice)) belonging to newly appearing  
1149 oligodendrocytes in cortical layer I (top zone) were traced using Simple Neurite tracer (Image J)  
1150 on day of appearance. Shown are examples of maximum intensity projections of these rendered  
1151 pseudocolored tracings. E: Newly formed control and remyelinating oligodendrocytes have  
1152 similar numbers of myelin sheaths ( $p = 0.628$ , unpaired two-tailed t-test). F-G: The total length  
1153 of myelin formed by a new cell (F) and the average length per sheath (G) for new control (blue)  
1154 and remyelinating (orange) cells. Remyelinating cells overall make significantly more myelin (F;  
1155  $p = 0.041$ , unpaired two-tailed t-test) and individual myelin sheaths are longer (G;  $p = 0.012$ ,  
1156 unpaired two-tailed t-test). H: The distribution of sheath lengths per cell traced is plotted (each  
1157 column represents the distribution of sheath lengths for an individual cell at 12-14 days from  
1158 appearance (control, blue; remyelinating, orange, with mean and SEM in gray). I-J: Vectors  
1159 were calculated from the cell body extending to each paranode of a reconstructed  
1160 oligodendrocyte at day 12-14, then  $x$  and  $y$  vector components were summed and oriented to  
1161 same direction of the vector sum. These are plotted (I) in 2-D for each cell traced (Control,  $N =$   
1162 10 cells from 3 mice; Cuprizone,  $N = 9$  cells from 3 mice), and were not significantly different  
1163 from uniformly radial (J, Control,  $-0.047 \pm 1.30$  (std) rad,  $p = 0.400$ ; Regenerated,  $0.076 \pm 1.30$   
1164 (std) rad,  $p = 0.256$ , Hodges-Ajne test of non-uniformity). The average circular morphologies for  
1165 new control or remyelinating cells (J, same cells as in I) exhibit similar degrees of circularity ( $p >$   
1166  $0.1$ ,  $k = 462$ , Kuiper two-sample test).

1167



1168

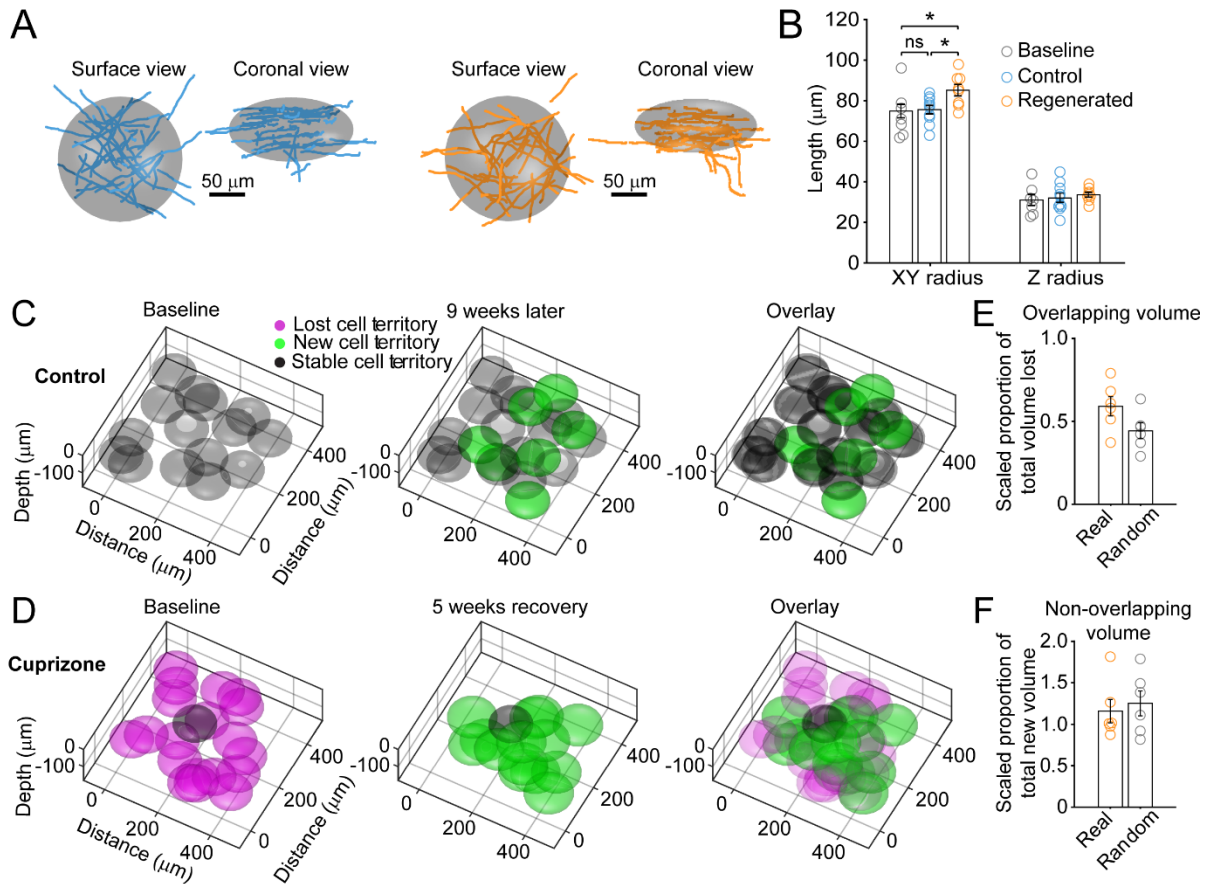

1169

1170 **Figure 4: Individual remyelinating oligodendrocytes myelinate cortical territory that is**  
 1171 **distinct from lost oligodendrocytes.**

1172 A-B: The best fit ellipsoid (E) that encompasses 80% of all myelin sheaths of an individual  
 1173 oligodendrocyte (examples shown in A for new control (blue) and remyelinating (orange) cells in  
 1174 the surface 0 -100  $\mu\text{m}$  zone (for x-y radius) and coronal (for z radius) views) was calculated and  
 1175 the average value ((Control (blue), N = 10 cells from 3 mice; Cuprizone (orange), N = 9 cells  
 1176 from 3 mice)) is plotted in B ((gray, cells at baseline (N = 7 cells from 4 mice)). Circles represent  
 1177 individual cells). Remyelinating cells were significantly wider (x-y radius) than new control cells  
 1178 ( $p = 0.025$ , one-way ANOVA). C-D: The average best-fit ellipsoids for control (C) or  
 1179 remyelinating cells (D) as calculated in (B) were plotted in example regions from the top 0-100  
 1180  $\mu\text{m}$  of cortex ( $425 \mu\text{m} \times 425 \mu\text{m} \times 100 \mu\text{m}$ ) based on location of cell bodies. E-F: The proportion  
 1181 of total territory volume at baseline that was overlapped by regenerated oligodendrocytes  
 1182 (scaled to take into account differences in numbers of baseline and regenerated cells; see  
 1183 Methods), and the additional volume encompassed by regenerated oligodendrocyte territory

1184 relative to total baseline volume (F), for 0-100  $\mu\text{m}$  regions in cuprizone-treated (orange, N = 6  
 1185 mice) and compared to the volumes predicted if the same number of regenerated cells  
 1186 appeared at random within the same volumes (gray). Regenerated oligodendrocyte territories  
 1187 partially overlap with baseline volume (E; 59.1%,  $p = 0.0778$  by one-way ANOVA) and  
 1188 encompass novel territory (F; 115%,  $p = 0.662$  by one-way ANOVA), at a similar proportion to  
 1189 regenerated cells placed at random.

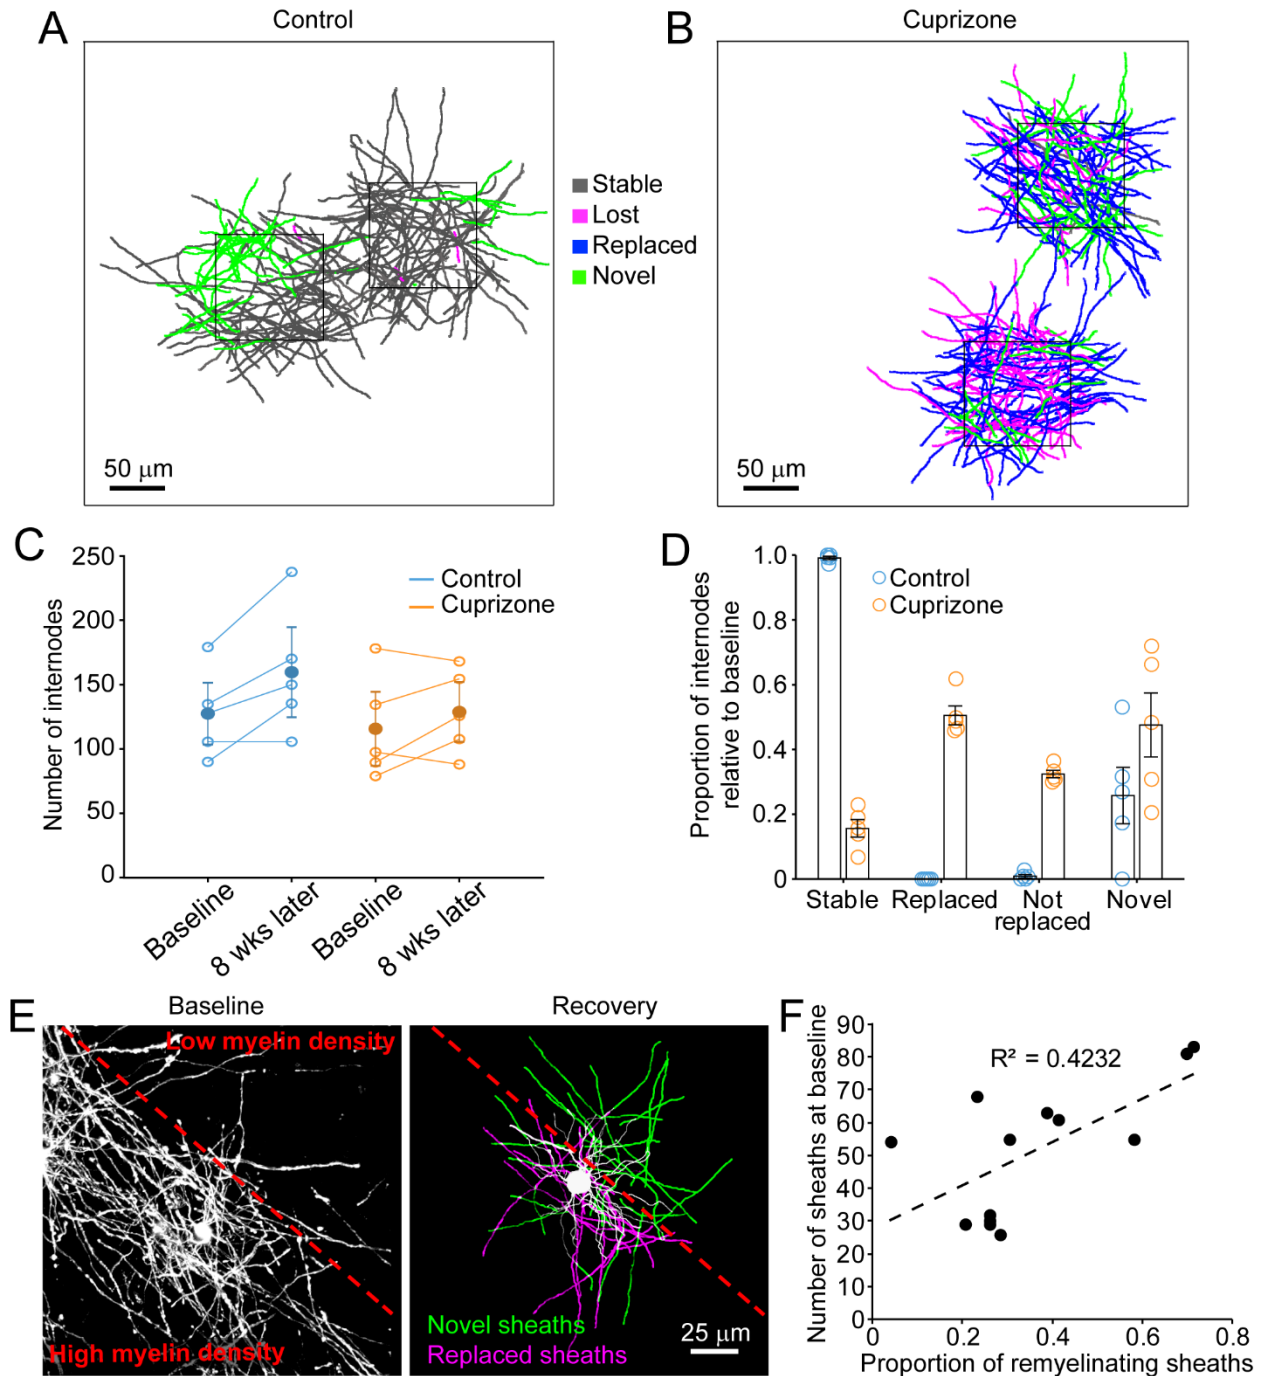

1190

1191 **Figure 5: After oligodendrocyte loss, regeneration results in a new pattern of cortical**  
1192 **myelin.** A-B. Individual myelin sheaths which passed through a 100  $\mu\text{m}$  x 100  $\mu\text{m}$  x 100  $\mu\text{m}$   
1193 volume within the top 0-100  $\mu\text{m}$  zone were traced, and the fate of each sheath within the volume  
1194 was determined to be stable (black), lost (magenta), replaced (blue) or novel (green) across the  
1195 time series. Examples of traced myelin sheaths with pseudocolor designation from control (A)  
1196 and cuprizone-treated (B) cortex are depicted. C: Total number of traced internodes at baseline  
1197 and after 8 weeks of imaging are plotted (circles represent means for individual mice, with line  
1198 connecting two time-points; mean for all mice is filled circle with SEM) for control (blue, N = 5),  
1199 and cuprizone-treated (orange, N = 5) mice. D: Quantification of internode fates from cuprizone-  
1200 treated (orange, N = 5) and control (blue, N = 5) mice (circles represent mean proportional  
1201 values relative to baseline from individual mice). Error bars are standard error of the mean. E:  
1202 Baseline panel on left is a maximum intensity projection (226  $\mu\text{m}$  x 226  $\mu\text{m}$  x 60  $\mu\text{m}$ ) illustrating  
1203 the myelin sheaths at baseline, with a red dashed line demarcating an area of higher (lower left)  
1204 v. lower myelin density (top right). Right panel is a rendering of a completely traced and  
1205 pseudocolored new oligodendrocyte that appears in the region at 3 days recovery and forms  
1206 myelin sheaths that either replace those lost (magenta) or are novel (green). F: The proportion  
1207 of replaced sheaths per new oligodendrocyte were plotted as a function of the number of  
1208 baseline myelin sheaths present within the territory (average remyelinating ellipsoid, see Figure  
1209 4A,B) of the new cells (13 remyelinating oligodendrocytes from N = 4 mice), correlation co-  
1210 efficient  $R^2 = 0.4232$ .

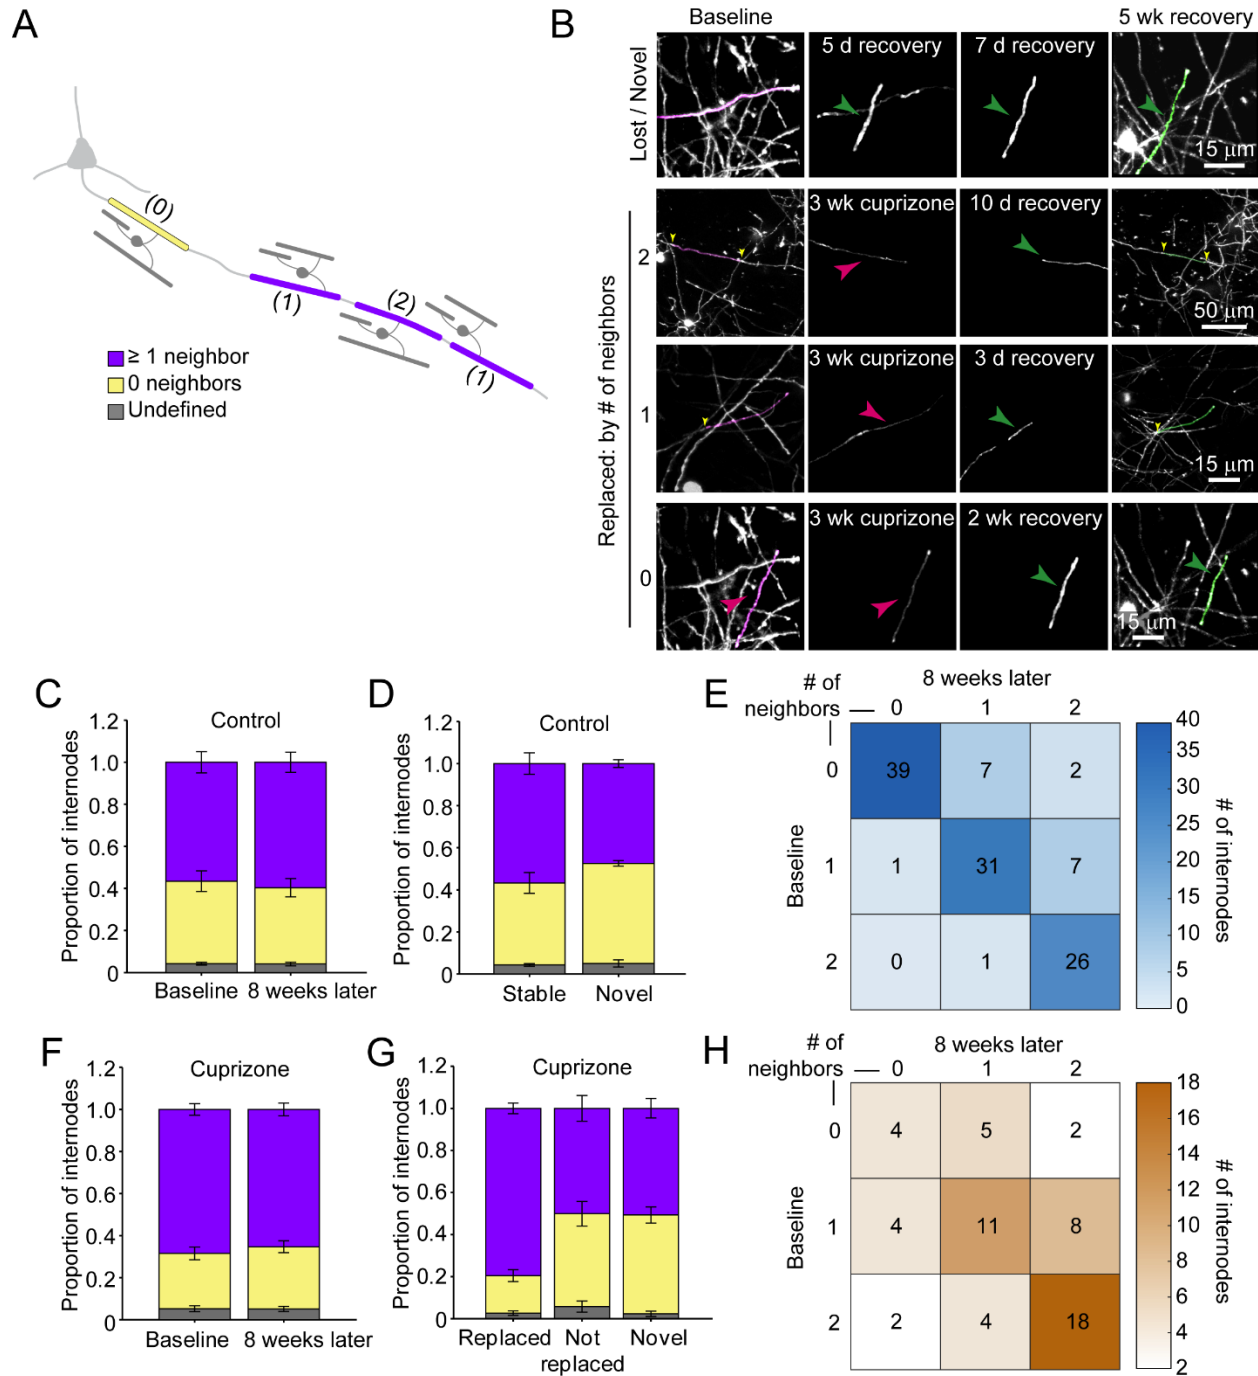

1211

1212

1213 **Figure 6: Myelin sheaths are more likely to be replaced if they had neighboring sheaths**  
 1214 **before demyelination.**

1215 A: Schematic of intermittent myelination of cortical axons, designating each internode by

1216 number of flanking myelin sheath neighbors (0, yellow; 1 or 2, lavender; or undefined, gray). B:

1217 Example maximum intensity projections of lost (magenta) and new (green) myelin sheaths from

1218 cuprizone-treated mice. Top row is an example of a lost, but not replaced, sheath, as well as a  
1219 novel sheath not present at baseline (green arrowhead). Remaining rows are examples of lost  
1220 (magenta sheaths and arrowheads) and replaced internodes (green sheaths and arrowheads)  
1221 that had 0, 1, or 2 neighboring sheaths at baseline. C, F: Comparison of mean proportion of  
1222 internodes with at least one neighbor (lavender), isolated (yellow), or undefined (gray) within a  
1223  $100\ \mu\text{m} \times 100\ \mu\text{m} \times 100\ \mu\text{m}$  volume at baseline and 8 weeks later, from control (C, N = 5) and  
1224 cuprizone-treated (F, N = 5) mice. Volumes from both control and cuprizone-treated conditions  
1225 have the same relative proportion of isolated vs.  $\geq 1$  neighboring internode at both time-points ( $p$   
1226  $> 0.05$ , N-way ANOVA with Bonferroni correction for multiple comparisons). D, G: Comparison  
1227 of the mean proportion of internodes with 0 or  $\geq 1$  neighbor that are stable or novel (control, D)  
1228 or replaced, not replaced, or novel (cuprizone, G). There is no significant difference in the  
1229 proportion of isolated vs.  $\geq 1$  neighbor population between stable and novel sheaths in control  
1230 (D,  $p > 0.05$ , unpaired two-tailed t-test with Bonferroni correction for multiple comparisons), nor  
1231 between lost and novel sheaths in cuprizone (G,  $p > 0.05$ , unpaired two-tailed t-test with  
1232 Bonferroni correction for multiple comparisons), but relatively more internodes with  $\geq 1$  neighbor  
1233 were replaced in cuprizone-treated cortex (G,  $p = 5.93 \times 10^{-7}$ , unpaired two-tailed t-test with  
1234 Bonferroni correction for multiple comparisons). E,H: The average number of internodes  
1235 categorized by number of neighbors at baseline and then at final imaging time-point, plotted in a  
1236 “myelination matrix” for control (E), where, there is a trend to increase number of neighbors over  
1237 8 weeks. In cuprizone-treated mice, the average number of neighbors for lost and replaced  
1238 internodes are categorized by number of neighbors at baseline (lost internode) and after 5  
1239 weeks of recovery (8 weeks imaging, replaced internode). Internodes with more neighbors at  
1240 baseline are more likely be replaced (largest average # of internodes in bottom right of matrix).



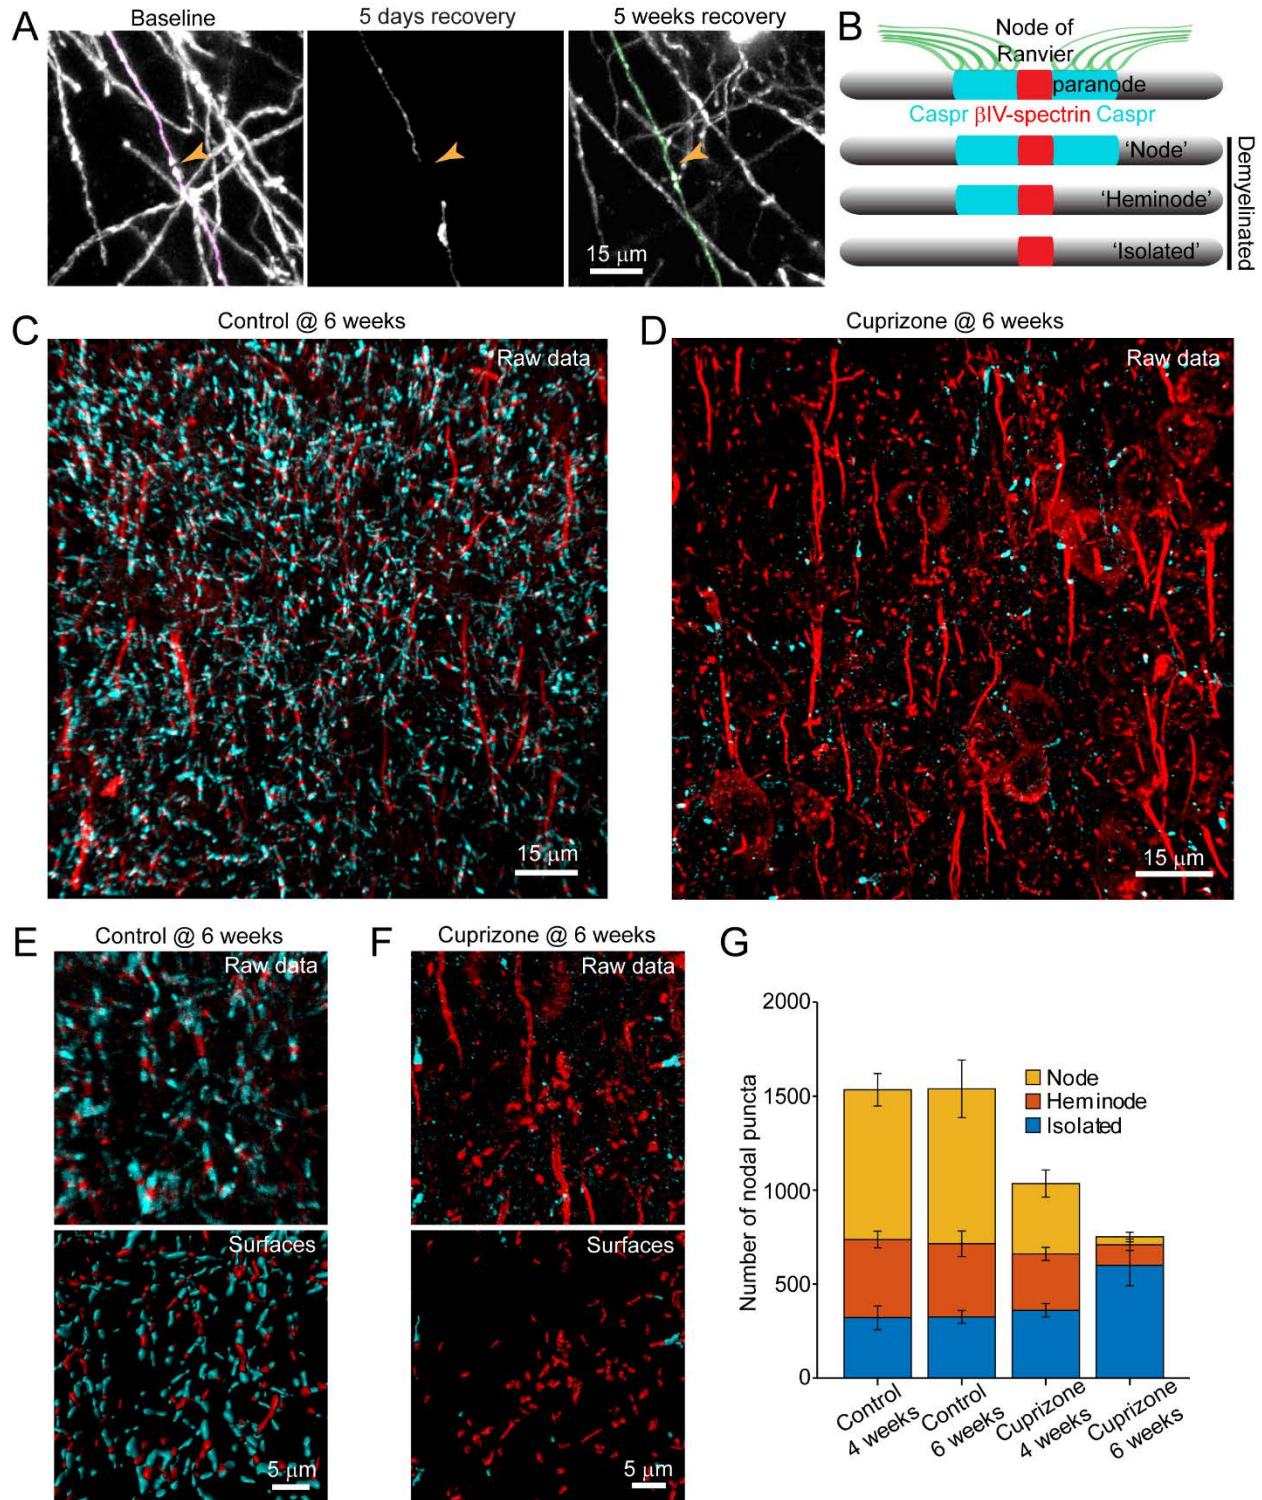

1241

1242

**Figure 7: Structural components of the node of Ranvier persist after demyelination.**

1243

A: Adult *Mobp-EGFP* mice were fed cuprizone-supplemented diet for three weeks and individual

1244

myelin sheaths were imaged and traced within a 100  $\mu$ m x 100  $\mu$ m x 100  $\mu$ m volume to



1245 determine their fate. An example of myelin sheaths that were lost (magenta, baseline), and  
1246 regenerated (green, 5 weeks recovery) are overlaid on maximum intensity projections from a  
1247 longitudinally imaged somatosensory cortical region. These traced myelin sheaths are shown  
1248 degenerating at 5 days recovery. Orange arrowhead denotes location of node of Ranvier at  
1249 baseline and a similar position after 2 neighboring myelin sheaths are regenerated at 5 weeks of  
1250 recovery. B. Schematic depicting axonal regions of a myelinated axon where  $\beta$ IV-spectrin (node  
1251 of Ranvier, red) and Caspr (paranode, cyan) localize. After demyelination, puncta of  $\beta$ IV-  
1252 spectrin can be found with 2 flanking Caspr puncta (“Nodes”), 1 flanking Caspr punctum  
1253 (“Heminode”), or no nearby Caspr puncta (“Isolated”). C-D: Adult *Mobp-EGFP* mice were fed  
1254 cuprizone-supplemented diet (D) or sham chow (C) for 6 weeks to induce loss of  
1255 oligodendrocytes and inhibit formation of new oligodendrocytes. Coronal sections from brains of  
1256 mice euthanized after 4 or 6 weeks of treatment were immunostained for  $\beta$ IV-spectrin and  
1257 Caspr. E-F: Magnified views of immunostained somatosensory cortex (Raw data) from control  
1258 (E) and cuprizone-treated (F) brains. Example post-processed “Surfaces” that were used to  
1259 calculate nearest neighbor distances between  $\beta$ IV-spectrin puncta and Caspr puncta within 3.5  
1260  $\mu$ m are shown for the same magnified images in E and F. Axon initial segments were excluded  
1261 from surface rendering. G: Total number of  $\beta$ IV-spectrin puncta categorized as either Node,  
1262 Heminode or Isolated. There are fewer overall  $\beta$ IV -spectrin puncta after 6 weeks of cuprizone  
1263 (compared to controls (@4 or 6 weeks) or 4 weeks of cuprizone, but relatively more isolated  
1264 puncta still present after 6 weeks of cuprizone treatment. (control @ 4 weeks, N = 3 mice;  
1265 control @ 6 weeks, N = 3 mice; cuprizone @ 4 weeks, N = 4 mice; cuprizone @ 6 weeks, N = 4  
1266 mice). Bars are SEM.  
1267  
1268  
1269

1270 SUPPLEMENTARY DATA

1271

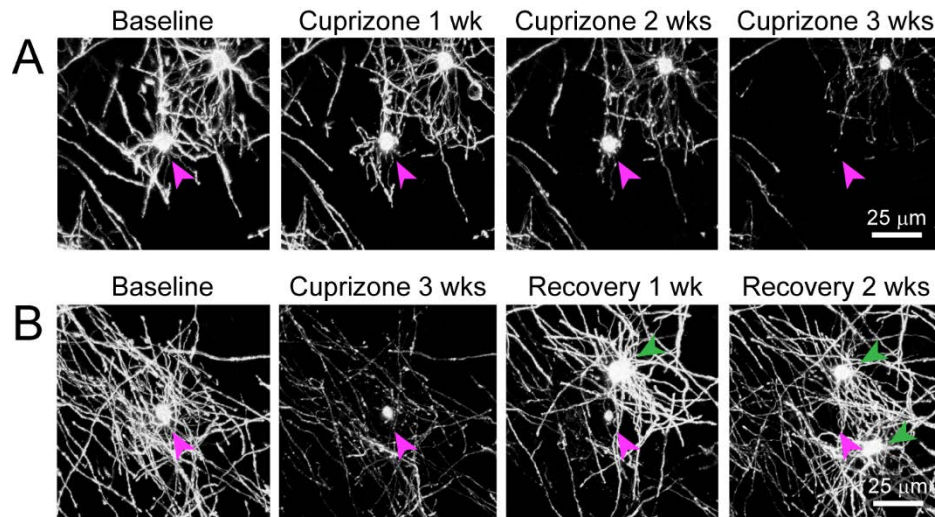

1272

1273 **Supplementary Figure 1: Degeneration of oligodendrocytes in cuprizone-treated *Mobp-***  
1274 ***EGFP* mice.** Shown are two examples of individual oligodendrocytes tracked longitudinally  
1275 using two photon *in vivo* imaging through chronic cranial windows in cuprizone-fed adult *Mobp-*  
1276 *EGFP* mice. A: Example of an oligodendrocyte present at baseline (cell body denoted with  
1277 magenta arrowhead) that loses GFP signal in processes and myelin sheaths and eventually cell  
1278 body by 3 weeks of cuprizone treatment (maximum intensity projection of 156 μm x 156 μm x 45  
1279 μm volume). B. Example of an oligodendrocyte present at baseline that loses GFP signal in  
1280 processes and myelin sheaths over a much longer time course than the cell in a, eventually  
1281 disappearing at 3 weeks of recovery, after new oligodendrocytes (green arrowheads) are  
1282 formed during recovery period (maximum intensity projection of 156 μm x 156 μm x 55 μm  
1283 volume).

1284

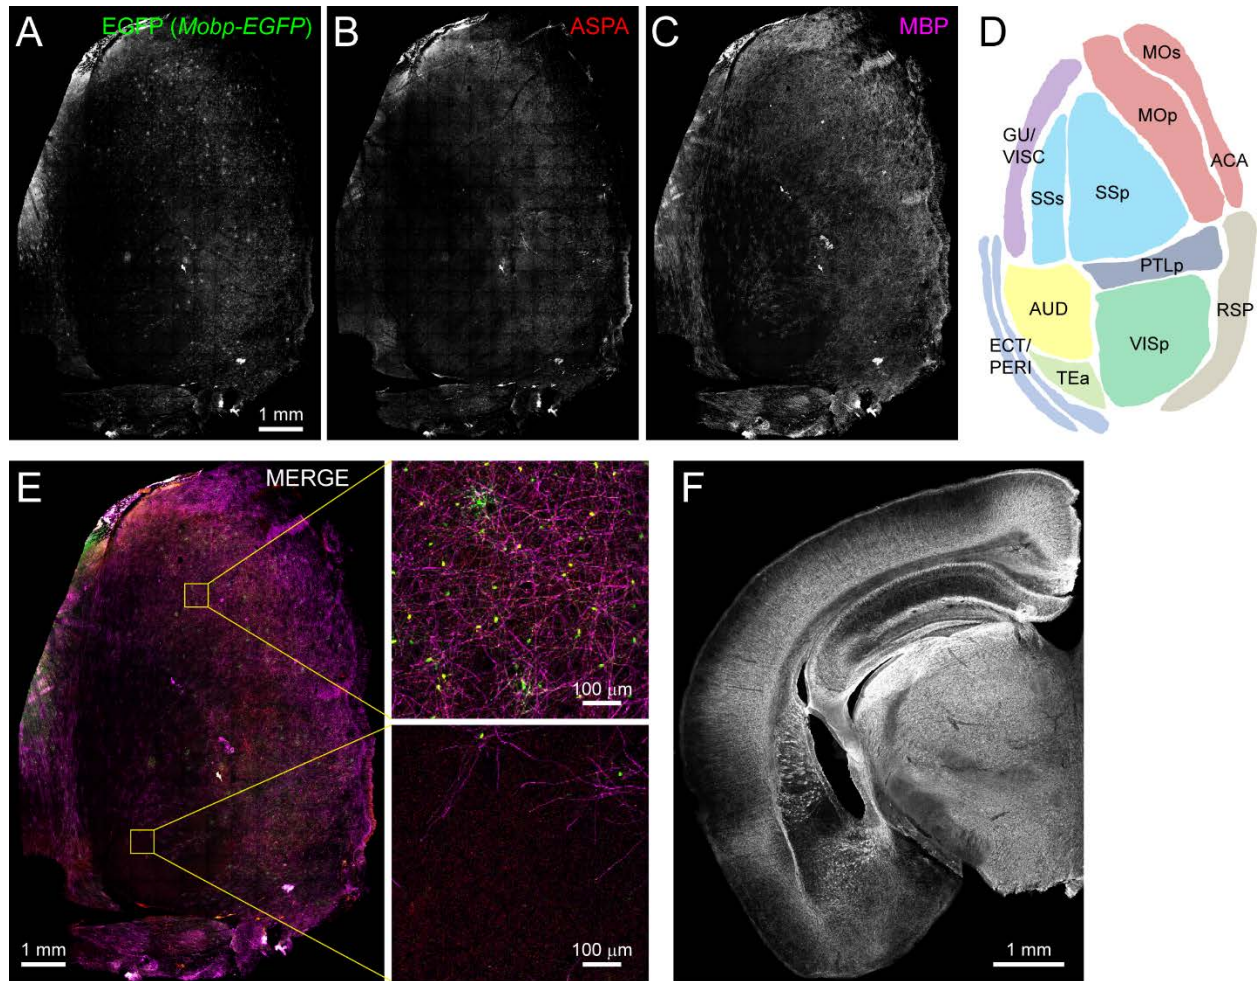

1285  
1286  
1287  
1288  
1289  
1290  
1291  
1292  
1293  
1294  
1295

**Supplementary Figure 2: Myelin is not uniformly distributed throughout the adult rodent cortex.** A-C: The left hemi-cortex from an adult *Mobp-EGFP* mouse is flattened and immunostained for EGFP (A), ASPA (B, oligodendrocytes) and MBP (C, myelin), merged together (E) and individual regions (schematized map in D) are expanded to illustrate that some cortical areas have a higher density of MBP+ myelin sheaths and GFP+/ASPA+ oligodendrocytes (top, primary somatomotor cortex) than others (bottom, auditory cortex). F: Coronal section from a 6-month old wild-type mouse immunostained for MBP shows regional heterogeneity of myelin across cortical mantle.



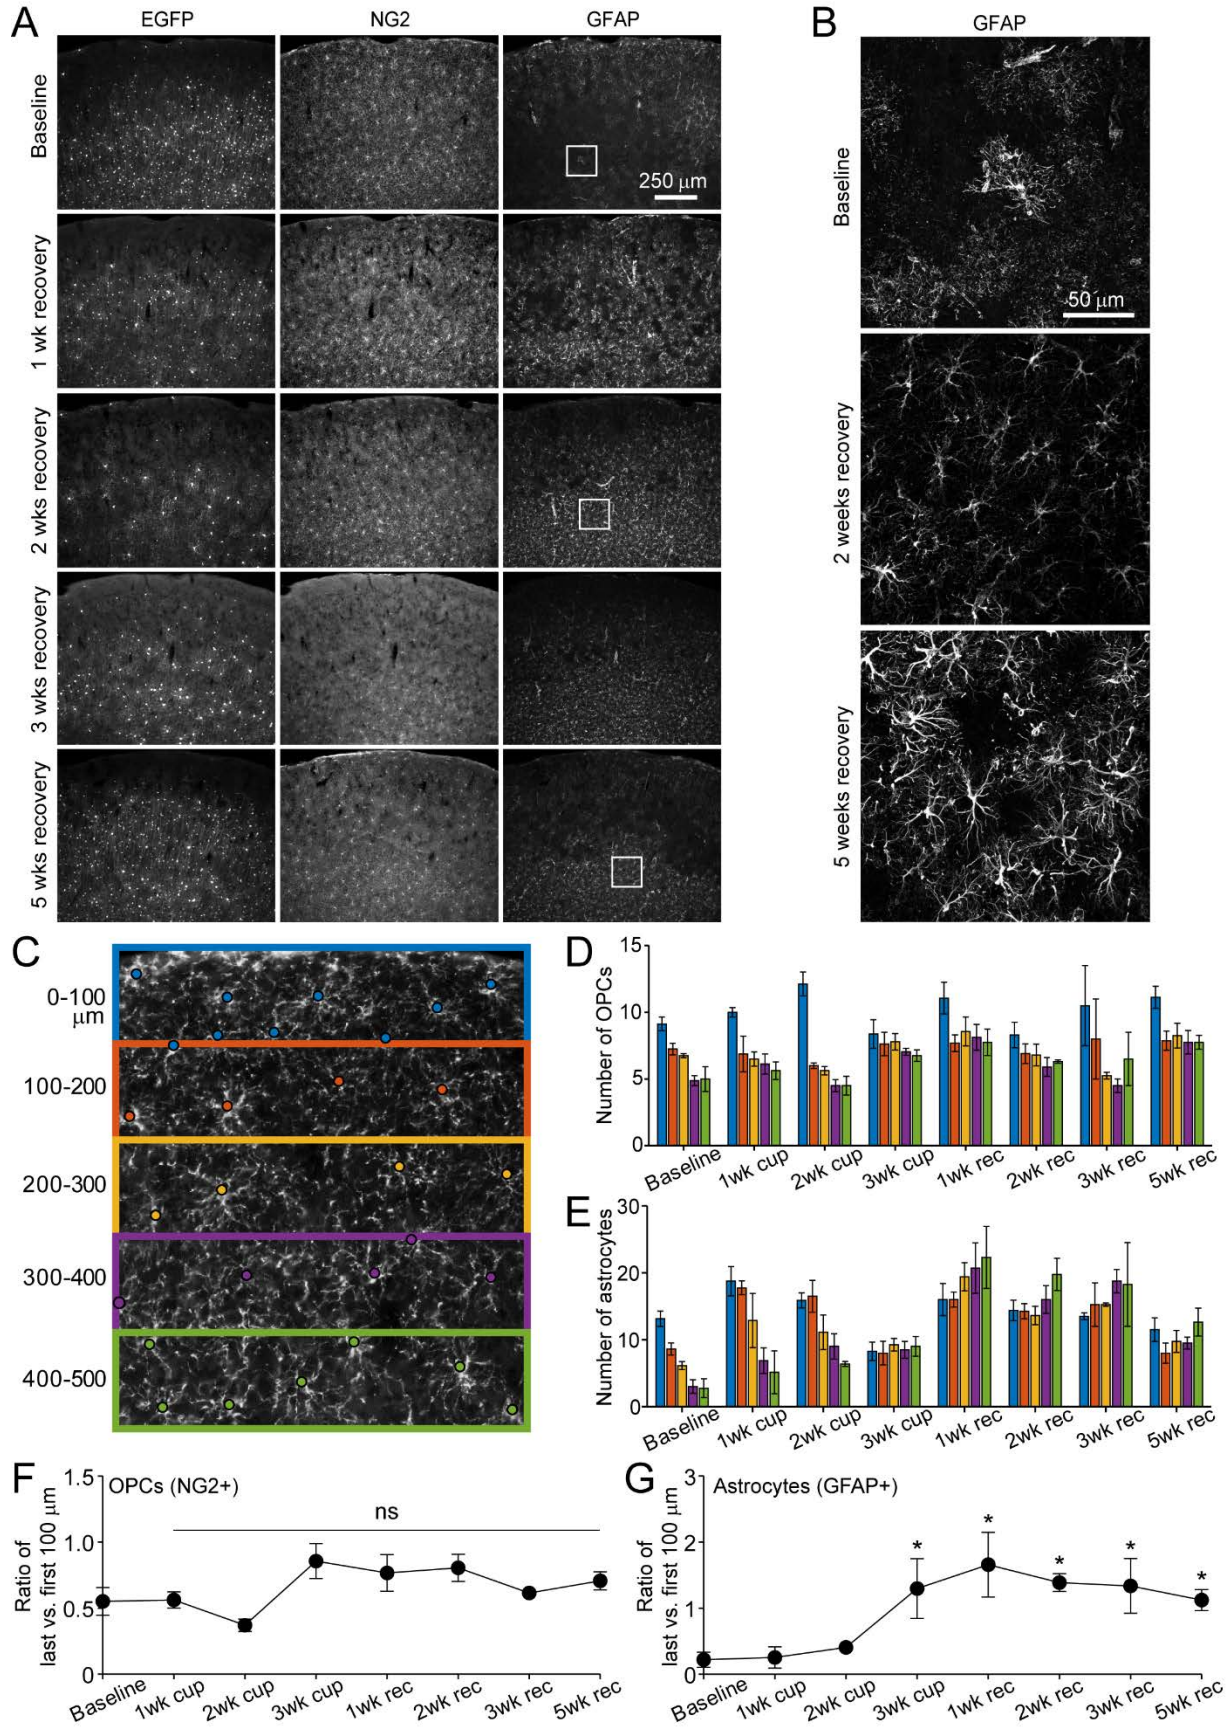

1297 **Supplementary Figure 3: Distribution of astrocytes and oligodendrocyte precursor cells**  
1298 **over the course of cuprizone treatment and recovery.** A: Example coronal images from the  
1299 brains of young adult *Mobp-EGFP* mice euthanized at baseline or following 3 weeks of  
1300 cuprizone administration followed by 1, 2, 3 or 5 weeks recovery. Sections were immunostained  
1301 for EGFP (oligodendrocytes), NG2 (OPCs) and GFAP (astrocytes). By 2 weeks of recovery, the  
1302 relatively sparse distribution of EGFP+ cells represent newly formed cells (as demonstrated by  
1303 *in vivo* imaging in Figure 1), with increasing number of new EGFP+ cells in lower cortical layers  
1304 in later weeks of recovery. NG2+ OPC distribution remains constant over the course of damage  
1305 and repair. GFAP+ cells increase in number after cuprizone and remain elevated in lower  
1306 cortical regions over several weeks of recovery. B: Example maximum intensity projections of  
1307 coronal sections from *Mobp-EGFP* mice euthanized at baseline, 2 weeks recovery or 5 weeks  
1308 recovery, immunostained for GFAP (213  $\mu\text{m}$  x 213  $\mu\text{m}$  x 35  $\mu\text{m}$ , from A). GFAP+ astrocyte  
1309 morphology becomes reactive after exposure to cuprizone and maintains reactive morphology,  
1310 even at 5 weeks of recovery. C: Example of a baseline somatosensory cortex coronal section  
1311 from an *Mobp-EGFP* mouse, immunostained for NG2+, and divided into 100  $\mu\text{m}$  zones from the  
1312 pial surface to 500  $\mu\text{m}$  in depth. The cell body location is marked with a circle. Each 100- $\mu\text{m}$   
1313 zone color coded from pial surface corresponds bar colors in D and E. D-E: Quantification of  
1314 cortical NG2+ cell distribution (D) , and GFAP+ astrocytes (E) from brains of adult *Mobp-*  
1315 *EGFP* mice euthanized at baseline (N = 4), 1 week of cuprizone (N = 4), 2 weeks of cuprizone  
1316 (N = 4), 3 weeks of cuprizone (N = 4), 1 week of recovery (N = 8), 2 weeks of recovery (N = 5),  
1317 or 3 weeks of recovery (N = 5 for NG2, N = 4 for GFAP), 5 weeks of recovery (N = 4). F-G. The  
1318 ratio of cell number in the last (400-500  $\mu\text{m}$ , green in C) versus first (0-100  $\mu\text{m}$ , blue in C) zone  
1319 for NG2+ OPCs (F) and GFAP+ astrocytes (G). Compared to baseline, the relative proportion of  
1320 NG2 cells in top vs. bottom regions is stable over the course of cuprizone-treatment and  
1321 recovery (F;  $p = 0.0858$ ; Kruskal-Wallis one-way ANOVA with Fisher's LSD) whereas the  
1322 number of GFAP+ cells significantly increase in the bottom zone after 2 weeks of cuprizone and  
1323 remain elevated (G,  $p = 0.0056$ , Kruskal-Wallis one-way ANOVA with Fisher's LSD ). Error bars  
1324 are standard error of the mean.  
1325

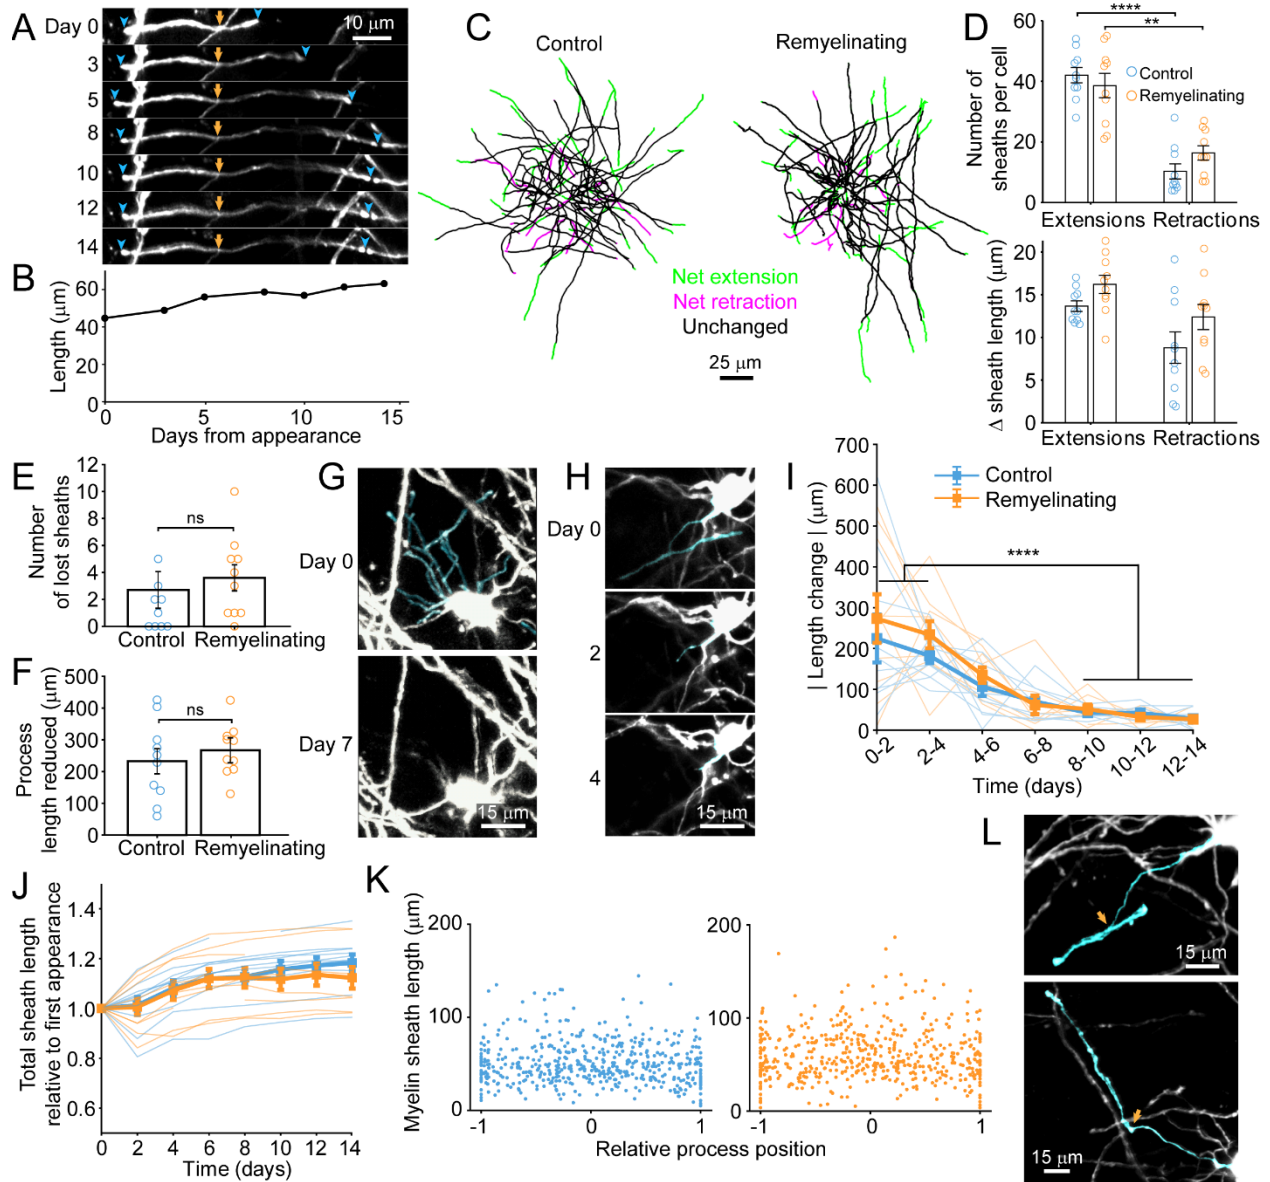

1326

1327

1328 **Supplementary Figure 4: Dynamics of oligodendrocyte maturation in adult *Mbp-EGFP***

1329 **mice.** Every cell body, and associated myelin sheath belonging to newly appearing

1330 oligodendrocytes in cortical layer I were traced using Simple Neurite Tracer (Image J) on day of

1331 appearance and imaged every 1-3 days for up to 14 days. A: An individual myelin sheath

1332 (demarcated by blue arrowheads at the paranodal tips) at day 0 was followed over 14 days. The

1333 left-side paranode extends (through day 5) and then retracts and the right-side paranode

1334 extends to encounter a neighboring sheath and subsequently flanks a node of Ranvier (day 14).

1335 The yellow arrow marks the position where the oligodendrocyte process connects to the myelin



1336 sheath. B: The overall length of the individual sheath shown in A increases over 14 days. C:  
1337 Example maximum intensity projections of traced processes and myelin sheaths from newly  
1338 formed cells in control or cuprizone-treated mice on day of appearance, that were followed over  
1339 14 days and length of individual traced sheaths are denoted as either unchanged (black) or  
1340 exhibiting net extension (green) or retraction (magenta). D: There were significantly more myelin  
1341 sheaths undergoing extension than retraction in newly formed cells (control,  $p = 4.11 \times 10^{-7}$ ;  
1342 remyelinating,  $p = 0.00119$ , unpaired two-tailed t-tests, with Bonferroni correction for multiple  
1343 comparisons) (top) but no difference in net length change of extensions or retractions (bottom),  
1344 and no significant difference between control or remyelinating cells. E-F: There were low  
1345 numbers of myelin sheaths lost in newly formed oligodendrocytes (E) and cytoplasmic  
1346 processes were retracted (F); but there were no significant differences between control or  
1347 remyelinating cells (sheaths,  $p = 0.907$ , unpaired two-tailed t-test; processes,  $p = 0.474$ ,  
1348 unpaired two-tailed t-test; control N = 10 cells, remyelinating N = 10 cells)). G-H: Examples of  
1349 cytoplasmic processes and myelin sheaths (cyan) present at day 0 in a newly formed  
1350 remyelinating cell, that are no longer present at day 7 (G) or day 4 (H). In H, the myelin sheath  
1351 is dissolved first (day 2) and then the process connecting it to the cell body retracts completely  
1352 by day 4. I-J: The absolute value of net total change in myelin sheath length over time is plotted  
1353 for newly formed traced cells in control (blue) and cuprizone-treated (orange) cortex (thick line  
1354 depicts means, thin lines represent individual cells). The majority of the length changes occur in  
1355 the first 4 days after appearance ( $p = 2.28 \times 10^{-6}$ , N-way ANOVA with Bonferroni correction for  
1356 multiple comparisons). J: The summed total length of all myelin sheaths per newly formed cell  
1357 are plotted as a proportion of the total length at day of appearance. The overall trend is  
1358 extension of myelin for both control and remyelinating cells. K: The length of individual myelin  
1359 sheaths across all reconstructed cells plotted against the contact point of the cytoplasmic  
1360 process to the myelin sheath, where 0 represents the center of an individual sheath (example in  
1361 L, top panel, cyan process intersecting the cyan sheath towards the center of the sheath at  
1362 orange arrow) and 1 or -1 are the distal tips of the sheath (example in L, bottom panel, cyan  
1363 process intersecting at the paranode of the cyan sheath at orange arrow).

1364

1365

1366 **Supplementary Video 1: Loss and replacement of oligodendrocytes.** Longitudinal *in vivo*  
1367 imaging of demyelination and remyelination. This is a  $392 \mu\text{m} \times 392 \mu\text{m} \times 100 \mu\text{m}$  volume  
1368 shown as a maximum intensity projection that was repeatedly imaged through a chronic cranial

1369 window over the somatosensory cortex in an adult *Mobp-EGFP* mouse, at baseline, over 3  
1370 weeks of cuprizone administration, and then through 5 weeks of recovery. Scale bar is 50  $\mu\text{m}$ .

1371 **Link:**

1372 [https://drive.google.com/file/d/18dTdmKwywMHbMt81p\\_64AshmRvgD8OEX/view?usp=sh](https://drive.google.com/file/d/18dTdmKwywMHbMt81p_64AshmRvgD8OEX/view?usp=sharing)  
1373 [aring](https://drive.google.com/file/d/18dTdmKwywMHbMt81p_64AshmRvgD8OEX/view?usp=sharing)

1374

1375 **Supplementary Video 2: New oligodendrocytes are added in the upper cortical layers in**  
1376 **adult mice.** Longitudinal imaging of an adult *Mobp-EGFP* mouse with a chronic cranial window  
1377 fed sham diet. Region corresponds to images shown in Figure 1E, top row. Scale bar is 25  $\mu\text{m}$ .

1378 **Link:**

1379 [https://drive.google.com/file/d/1b6up2\\_RWkh5qetrvYlqGv7kBQirTkFSi/view?usp=sharing](https://drive.google.com/file/d/1b6up2_RWkh5qetrvYlqGv7kBQirTkFSi/view?usp=sharing)

1380

1381 **Supplementary Video 3: Oligodendrocytes are lost and new cells appear after cuprizone-**  
1382 **treatment.** Longitudinal imaging of an adult *Mobp-EGFP* mouse with a chronic cranial window  
1383 fed 3 weeks of a cuprizone-supplemented diet followed through 5 weeks of recovery. Region  
1384 corresponds to images shown in Figure 1E, bottom row. Scale bar is 25  $\mu\text{m}$ .

1385 **Link:**

1386 [https://drive.google.com/file/d/1keWRJV08kbN1khxA0tzdQzZV8GsPrL0j/view?usp=sharin](https://drive.google.com/file/d/1keWRJV08kbN1khxA0tzdQzZV8GsPrL0j/view?usp=sharing)  
1387 [g](https://drive.google.com/file/d/1keWRJV08kbN1khxA0tzdQzZV8GsPrL0j/view?usp=sharing)

1388

1389 **Supplementary Video 4: Myelin sheaths are lost and novel sheaths are formed after**  
1390 **cuprizone-treatment.** Longitudinal imaging of an adult *Mobp-EGFP* mouse with a chronic  
1391 cranial window fed 3 weeks of a cuprizone-supplemented diet followed through 5 weeks of  
1392 recovery. A myelin sheath at baseline (traced and pseudocolored magenta, overlayed in  
1393 maximum intensity projection of longitudinally-imaged region), degenerates over time (only the  
1394 traced sheath from baseline is shown in subsequent time-points, and is lost by 1 week of  
1395 recovery). At 5 days of recovery a novel isolated sheath (not present at baseline, traced and  
1396 pseudocolored in green in the 5 week recovery time-point overlay) appears, formed by a  
1397 remyelinating oligodendrocyte not present at baseline (cell in 5 week recovery time-point  
1398 overlay). Scale bar is 15  $\mu\text{m}$ .

1399 **Link:**

1400 [https://drive.google.com/file/d/1fyVMqIAPOTH45SIOfgpWOq\\_yC-](https://drive.google.com/file/d/1fyVMqIAPOTH45SIOfgpWOq_yC-PoI45U/view?usp=sharing)  
1401 [PoI45U/view?usp=sharing](https://drive.google.com/file/d/1fyVMqIAPOTH45SIOfgpWOq_yC-PoI45U/view?usp=sharing)

1402

1403 **Supplementary Video 5: Isolated myelin sheaths are replaced.** Longitudinal imaging of an  
1404 adult *Mobp-EGFP* mouse with a chronic cranial window fed 3 weeks of a cuprizone-  
1405 supplemented diet followed through 5 weeks of recovery. An isolated myelin sheath at baseline  
1406 (traced and pseudocolored magenta, overlaid in maximum intensity projection of  
1407 longitudinally-imaged region), degenerates over time (only the traced sheath from baseline is  
1408 shown in subsequent time-points, and is lost by 3 days of recovery). At 5 days of recovery a  
1409 replacement isolated sheath appears (traced and pseudocolored in the 5 week recovery time-  
1410 point overlay), formed by a remyelinating oligodendrocyte not present at baseline (cell in 5 week  
1411 recovery time-point overlay). Scale bar is 15  $\mu\text{m}$ .

1412 **Link:**

1413 [https://drive.google.com/file/d/1T6-Y0-  
1414 rz7Gx32zjJMSaLcq9B6AAyETvM/view?usp=sharing](https://drive.google.com/file/d/1T6-Y0-rz7Gx32zjJMSaLcq9B6AAyETvM/view?usp=sharing)

1415

1416 **Supplementary Video 6: Neighboring myelin sheaths with at least one neighbor are  
1417 replaced and form a node of Ranvier in close proximity to one present at baseline.**

1418 Longitudinal imaging of an adult *Mobp-EGFP* mouse with a chronic cranial window fed 3 weeks  
1419 of a cuprizone-supplemented diet followed through 5 weeks of recovery. Two neighboring  
1420 myelin sheaths (pseudocolored magenta in baseline time-point), flank an unlabeled node of  
1421 Ranvier (paranodal loops of myelin accumulate cytoplasmic EGFP in *Mopb-EGFP* mice  
1422 (Hughes et al., 2018)); these sheaths were traced over each imaging time-points, and  
1423 degenerate after cuprizone-treatment. Remyelinating oligodendrocytes (one shown in 5 week  
1424 recovery time-point) form replacement myelin sheaths (pseudocolored green in 5 week recovery  
1425 time-point); appear to flank an unlabeled node of Ranvier in a similar position as baseline. Scale  
1426 bar is 15  $\mu\text{m}$ .

1427 **Link:**

1428 [https://drive.google.com/file/d/1jA\\_IK-Cj3\\_TGINfeJ32n-6GQ8E2OeLSv/view?usp=sharing](https://drive.google.com/file/d/1jA_IK-Cj3_TGINfeJ32n-6GQ8E2OeLSv/view?usp=sharing)

1429

1430 Supplementary Table: Key Resources

1431 **Primary antibodies**

| Target<br>Protein/markers | Host<br>species | Source  | Dilution | Catalog # | Identifier      |
|---------------------------|-----------------|---------|----------|-----------|-----------------|
| Aspartoacylase<br>(ASPA)  | Rabbit          | Genetex | 1:1500   | GTX113389 | RRID:AB_2036283 |

|                  |            |                                                                                                     |          |          |                                   |
|------------------|------------|-----------------------------------------------------------------------------------------------------|----------|----------|-----------------------------------|
| GFP              | Goat       | Cell Signaling                                                                                      | 1:500    | 5664     | RRID:AB_10705523                  |
| GFP              | Chicken    | Aves Lab                                                                                            | 1:1500   | GFP-1020 | RRID:AB_2307313                   |
| GFP              | Rabbit     | Richard Haganir Lab                                                                                 | 1:1000   | JH40330  | Gift from R. Haganir              |
| MBP              | Mouse      | Sternberger                                                                                         | 1:2000   | 808401   | RRID:AB_2564741                   |
| MBP              | Chicken    | Aves Lab                                                                                            | 1:500    | F-1005   | RRID:AB_2313550                   |
| NG2              | Guinea pig | Generated in D.E. Bergles lab against entire NG2 protein                                            | 1:10,000 | n/a      | Kang et al., 2013; PMID: 23542689 |
| GFAP             | Rabbit     | Dako                                                                                                | 1:500    | N1506    | RRID:AB_10013482                  |
| Beta IV Spectrin | Rabbit     | Generated by M. Rasband Lab                                                                         | 1:300    |          | Gift from M. Rasband lab          |
| Beta IV Spectrin | Chicken    | Generated by M. Rasband Lab                                                                         | 1:100    |          | Gift from M. Rasband              |
| Ankrin G         | Rabbit     | Generated by M. Rasband Lab                                                                         | 1:200    |          | Gift from M. Rasband lab          |
| Caspr            | Guinea pig | Generated by Manzhoor Bhat Lab (Department of Cellular and Integrative Physiology UT Health Science | 1:1500   |          | Gift from M. Bhat                 |

|  |  |                     |  |  |  |
|--|--|---------------------|--|--|--|
|  |  | Center San Antonio) |  |  |  |
|--|--|---------------------|--|--|--|

1432

1433 **Secondary antibodies**

| Target Species  | Conjugate | Source         | Dilution | Catalog #   | Identifier      |
|-----------------|-----------|----------------|----------|-------------|-----------------|
| Anti-Rabbit     | Alexa 488 | Jackson Immuno | 1:2000   | 711-546-152 | RRID:AB_2340619 |
| Anti-Rabbit     | Cy3       | Jackson Immuno | 1:2000   | 711-166-152 | RRID:AB_2313568 |
| Anti-Rabbit     | Cy5       | Jackson Immuno | 1:2000   | 711-606-152 | RRID:AB_2340625 |
| Anti-Mouse      | Alexa 488 | Jackson Immuno | 1:2000   | 715-546-150 | RRID:AB_2340849 |
| Anti-Mouse      | Cy3       | Jackson Immuno | 1:2000   | 715-166-151 | RRID:AB_2340817 |
| Anti-Mouse      | Cy5       | Jackson Immuno | 1:2000   | 715-175-151 | RRID:AB_2340820 |
| Anti-Guinea Pig | FITC      | Jackson Immuno | 1:2000   | 706-096-148 | RRID:AB_2340454 |
| Anti-Guinea Pig | Cy3       | Jackson Immuno | 1:2000   | 706-166-148 | RRID:AB_2340461 |
| Anti-Guinea Pig | Cy5       | Jackson Immuno | 1:2000   | 706-606-148 | RRID:AB_2340477 |
| Anti-Goat       | Alexa 488 | Jackson Immuno | 1:2000   | 705-546-147 | RRID:AB_2340430 |
| Anti-Goat       | Cy3       | Jackson Immuno | 1:2000   | 705-166-147 | RRID:AB_2340413 |
| Anti-Chicken    | Alexa 488 | Jackson Immuno | 1:2000   | 703-546-155 | RRID:AB_2340376 |
| Anti-Chicken    | Cy5       | Jackson Immuno | 1:2000   | 703-006-155 | RRID:AB_2340347 |

1434



1435 **Software and Algorithms**

| <b>Name</b>           | <b>Source</b>                                                       | <b>Identifier</b> |
|-----------------------|---------------------------------------------------------------------|-------------------|
| ZEN Blue/Black        | Zeiss                                                               | RRID:SCR_013672   |
| ImageJ                | <a href="https://imagej.nih.gov/ij/">https://imagej.nih.gov/ij/</a> | RRID:SCR_003070   |
| Fiji                  | <a href="http://fiji.sc">http://fiji.sc</a>                         | RRID:SCR_002285   |
| Adobe Illustrator CS6 | Adobe                                                               | RRID:SCR_014198   |
| MATLAB                | Mathworks                                                           | RRID:SCR_001622   |
| SyGlass               | IstoVisio                                                           | RRID:SCR_017961   |
| Imaris                | Bitplane                                                            | RRID:SCR_007370   |

1436
